# Supplementary material
Source: PubMed Central journal article supplement (PMC3530929)
Supplement: NIHMS420508-supplement-Supplementary_Information.pdf [file NIHMS420508-supplement-Supplementary_Information.pdf]

**Supporting Information**  
**Discovery and Synthesis of Hydronaphthoquinones as Novel**  
**Proteasome Inhibitors**

Yiyu Ge,<sup>†, ‡, ¶</sup> Aslamuzzaman Kazi,<sup>†, ¶</sup> Frank Marsilio,<sup>‡</sup> Yunting Luo,<sup>‡</sup> Sanjula Jain<sup>†</sup>, Wesley Brooks,<sup>‡</sup> Kenyon G. Daniel,<sup>‡</sup> Wayne C. Guida,<sup>†, ‡, ||, §</sup> Saïd M. Sebti,<sup>†, §</sup> and Harshani R. Lawrence<sup>\*, †, ‡</sup>

**Contents**

1. <sup>1</sup>H NMR, <sup>13</sup>C NMR, LCMS, HRMS and HPLC spectra of Compound **1**
2. <sup>1</sup>H NMR, <sup>13</sup>C NMR, LCMS, HRMS and HPLC spectra of Compound **15b**
3. <sup>1</sup>H NMR, <sup>13</sup>C NMR, LCMS, HRMS and HPLC spectra of Compound **15c**
4. <sup>1</sup>H NMR, <sup>13</sup>C NMR, LCMS, HRMS and HPLC spectra of Compound **15d**
5. <sup>1</sup>H NMR, <sup>13</sup>C NMR, LCMS, HRMS and HPLC spectra of Compound **15h**
6. <sup>1</sup>H NMR, <sup>13</sup>C NMR, LCMS, HRMS and HPLC spectra of Compound **15j**
7. <sup>1</sup>H NMR, <sup>13</sup>C NMR, LCMS, HRMS and HPLC spectra of Compound **15k**
8. <sup>1</sup>H NMR, <sup>13</sup>C NMR, LCMS, HRMS and HPLC spectra of Compound **29**
9. <sup>1</sup>H NMR, <sup>13</sup>C NMR, LCMS, HRMS and HPLC spectra of Compound **39**
10. <sup>1</sup>H NMR analysis of intermediates **8a**, **9a**, **12** and **13a** to show the regioselectivity of coupling described in Scheme 2.

**1. Compound 1:**  
**<sup>1</sup>H NMR**

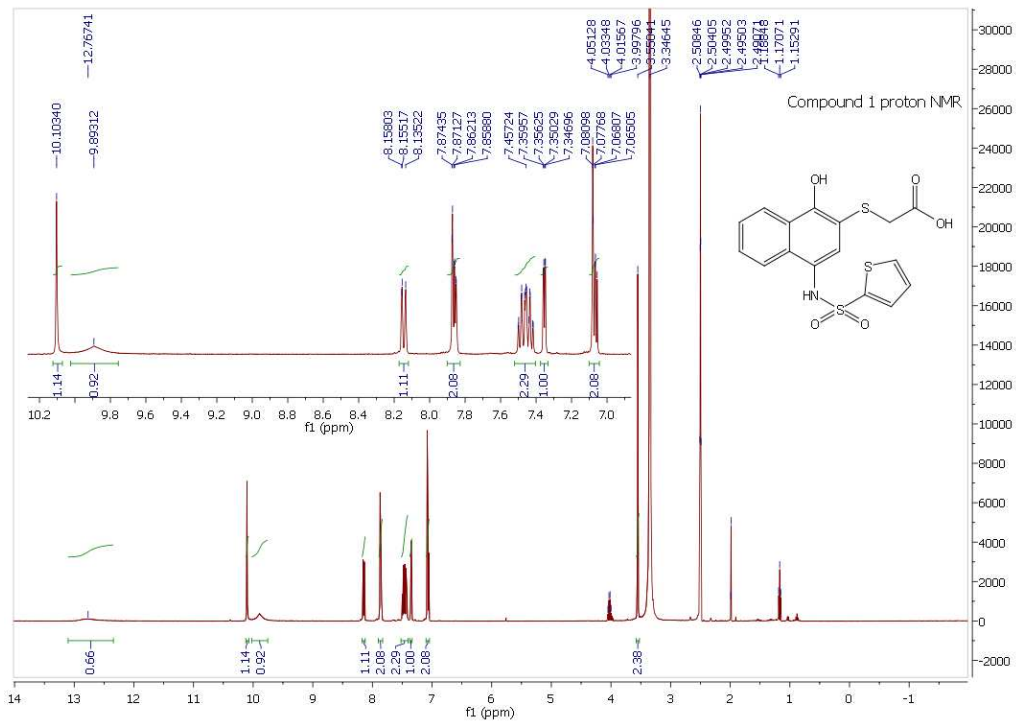

**<sup>13</sup>C NMR**

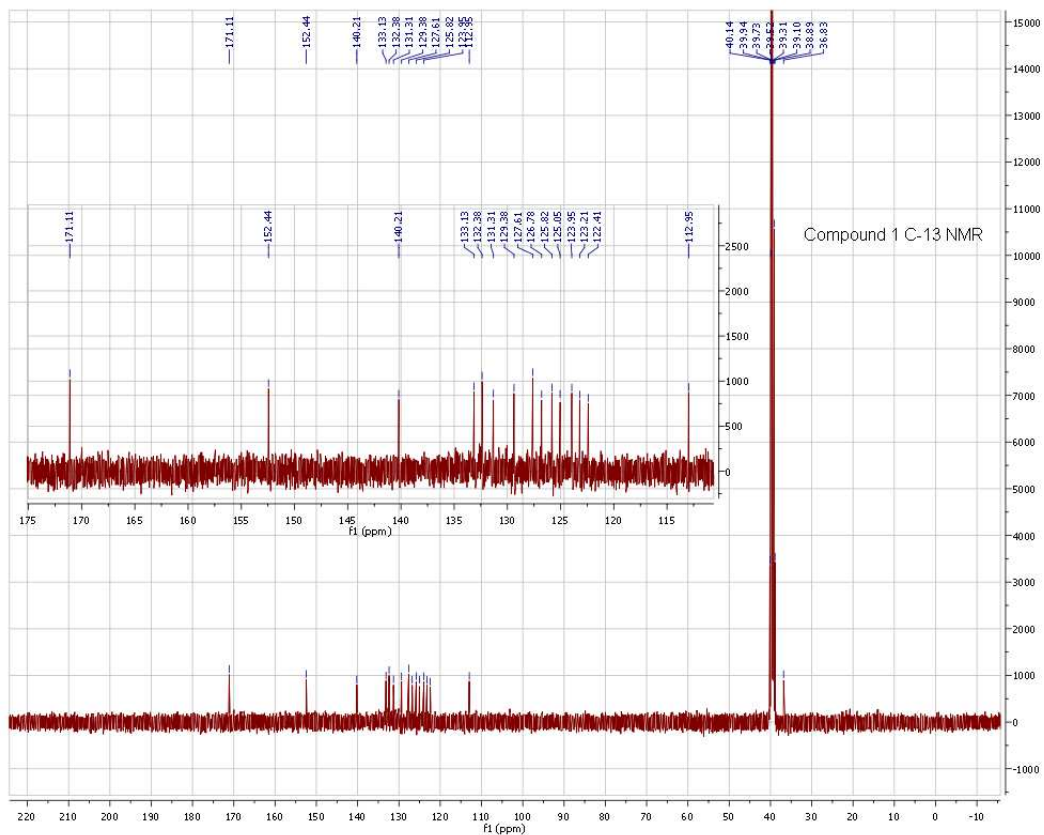

Sample#: YG1-066 Sample Location: P1-B-02 Sample Id: YG1-066 Operator: EasyAccess  
 Data File Name: D:\PE Sciex Data\Projects\chemist07-08\Data\170708-NEG100\_1000-01474.wiff Acq Time: July 17 2008, 10:09:15 AM  
 Method: D:\TOF\_Data\damethods\EASY ACCESS1.ANM\mass\_list.xml

One or more scans have failed IRM. Review the data file for details.

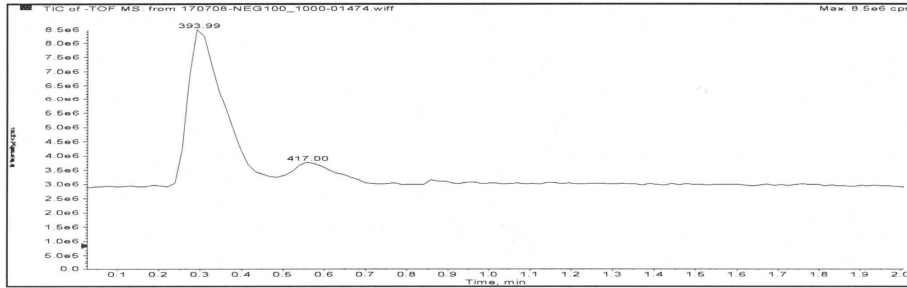

Period#: Average of all periods Experiment#: Average of all experiments

| Peak# | Experiment# | Time | Area       | Most Abundant Masses/scan |
|-------|-------------|------|------------|---------------------------|
| 1     | 1           | 0.30 | 3.43491 E7 | 393.98851                 |

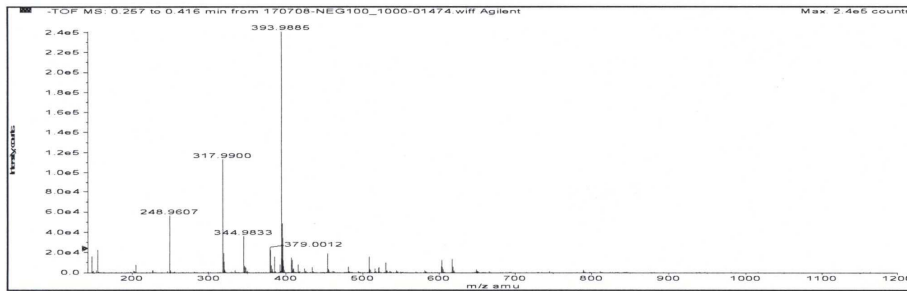

Peak#: 1 Experiment#: 1 Retention Time: 0.30 min

Sample Name: YG1-066 Sample Location: P1-A-01 Sample Id: YG1-066 Operator: EasyAccess  
 Data File Name: D:\PE\_Sciex\_Data\Projects\chemist07-08\Data\180708-NEG100\_1000-01497.wiff Acq Time: July 18 2008, 07:25:11 AM  
 Method: D:\TOF\_Data\damethods\EASY\_ACCESS2.ANM\efc.xml

One or more scans have failed IRM. Review the data file for details.

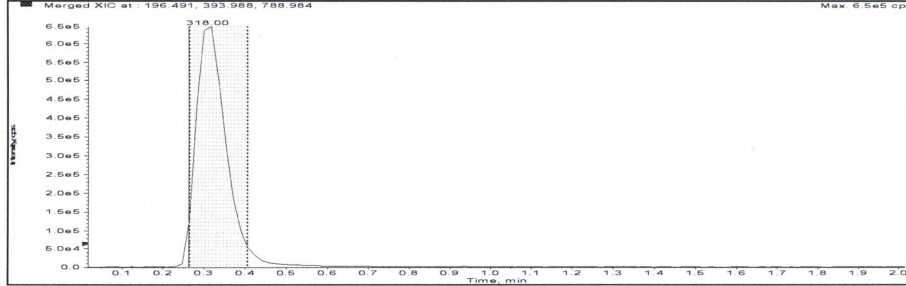

Merged XIC, Period# : 1 Experiment# : 1

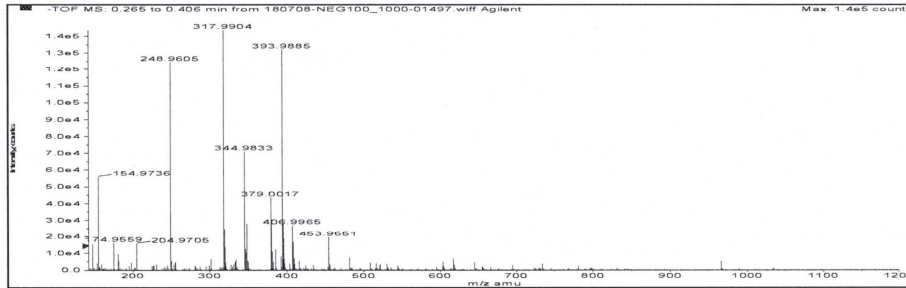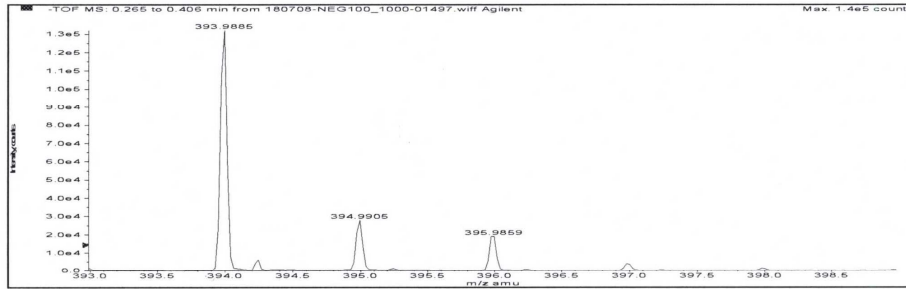

| Formula     | Compound name | Mass      | Peak RT (min) | Peak area  | Description |
|-------------|---------------|-----------|---------------|------------|-------------|
| C16H13NO5S3 | --            | 394.99558 | 0.31          | 3.23556 E6 | --          |

| Species | Abundance (counts) | Ion Mass  | Measured Mass | Error (mDa) | Error (ppm) | Ret. Time Error (min) |
|---------|--------------------|-----------|---------------|-------------|-------------|-----------------------|
| [M-H]-  | 135068.67          | 393.98831 | 393.98854     | 0.23500     | 0.60        | --                    |

Friday, July 18, 2008

7:27:22 AM

**Area % Report**

Data File: C:\EZChrom Elite\Enterprise\Projects\HTS Chemistry\Data\Yiyu\proteasome\YG1-066 CH3CN 35 H2O 65 TFA 0.1 1ml 30 min.met 7-23-2010 2-45-30 PM.dat  
 Method: C:\EZChrom Elite\Enterprise\Projects\HTS Chemistry\Method\Yiyu\analytical\CH3CN 35 H2O 65 TFA 0.1 1ml 40 min-postrun.met  
 Acquired: 7/23/2010 2:47:47 PM  
 Printed: 7/23/2010 3:19:59 PM

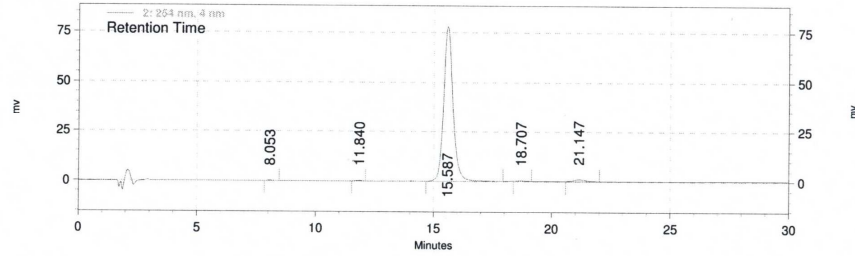

**2: 254 nm, 4 nm Results**

| Retention Time | Area    | Area % |
|----------------|---------|--------|
| 8.053          | 4427    | 0.20   |
| 11.840         | 4423    | 0.20   |
| 15.587         | 2149247 | 97.63  |
| 18.707         | 7808    | 0.35   |
| 21.147         | 35511   | 1.61   |

| Totals | Area    | Area % |
|--------|---------|--------|
|        | 2201416 | 100.00 |

-----  
 ---< General Method Parameters >-----  
 -----

No items selected for this section

-----  
 ---< 2: 254 nm, 4 nm >-----  
 -----

No items selected for this section

## 2. Compound 15b

### <sup>1</sup>H NMR

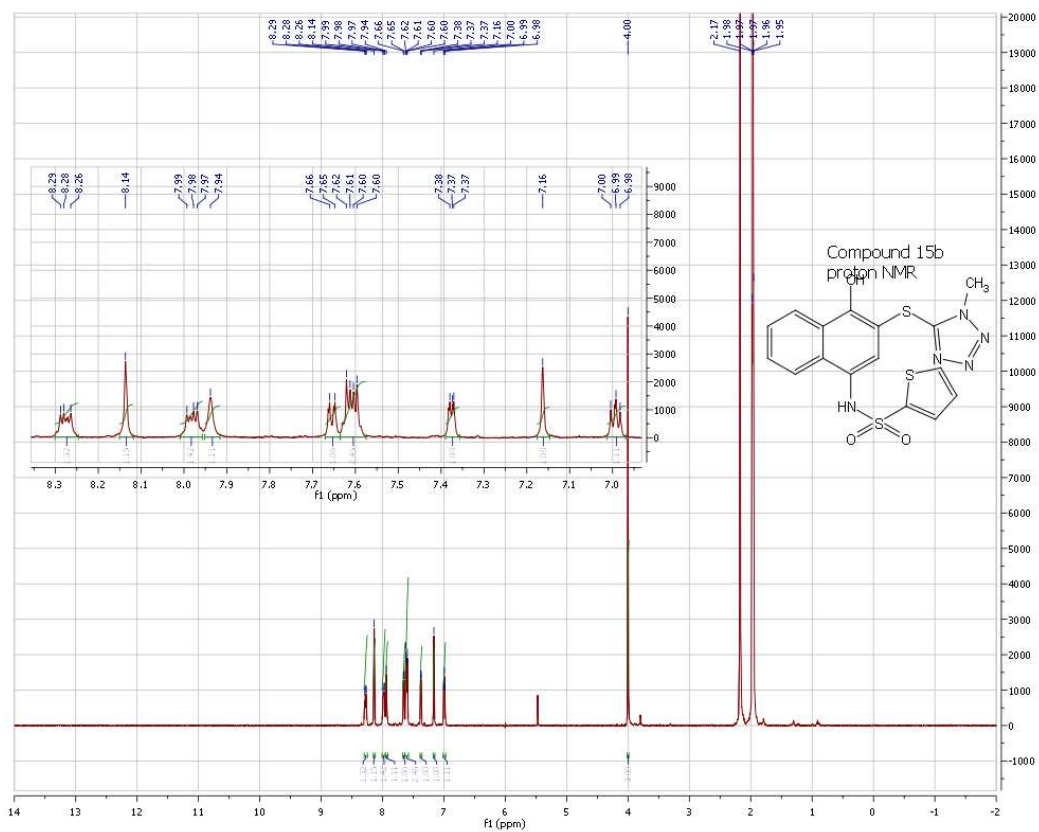

### <sup>13</sup>C NMR

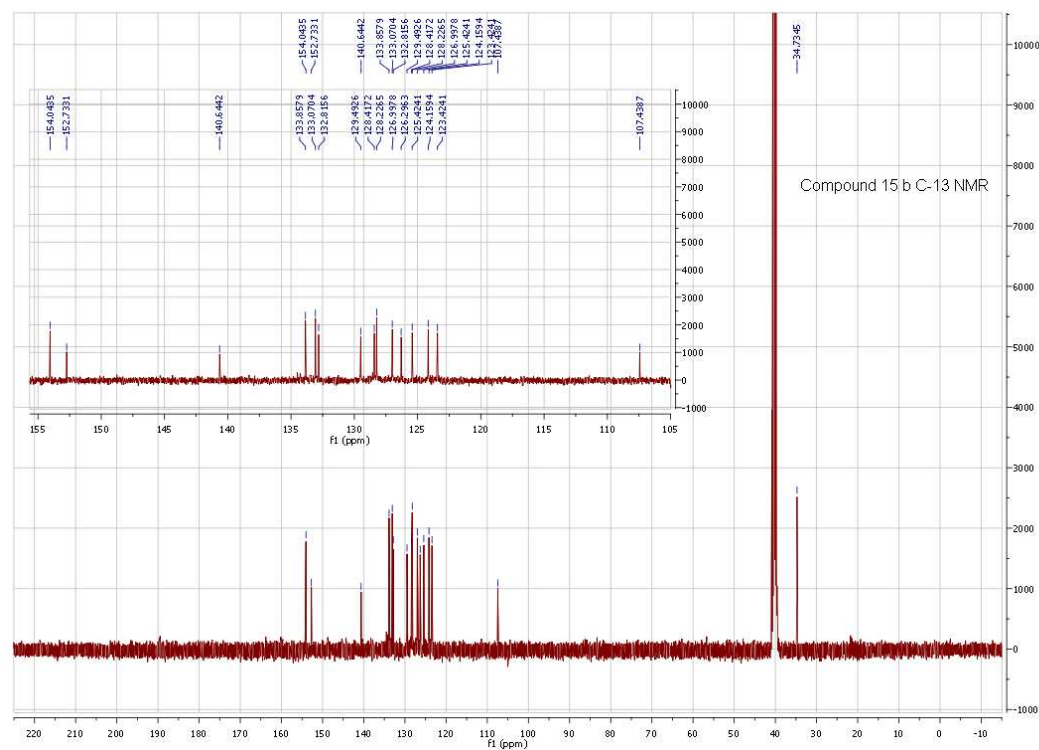

Sample#: YG1-159-1 Sample Location: P1-B-02 Sample Id: YG1-159-1 Operator: EasyAccess  
 Data File Name: D:\PE\_Sciex\_Data\Projects\chemist10-08\Data\081008-ESI\_POS2-03430.wiff Acq Time: October 08 2008 06:44:14 PM  
 Method: D:\TOF\_Data\damethods\EASY ACCESS1.ANM\mass\_list.xml

One or more scans have failed IRM. Review the data file for details.

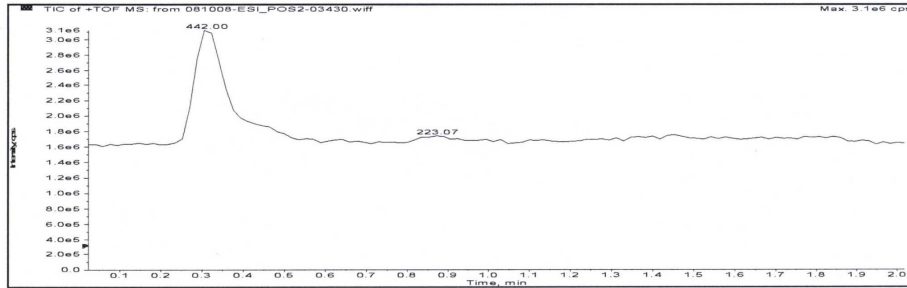

Period# : Average of all periods Experiment# : Average of all experiments

| Peak# | Experiment# | Time | Area       | Most Abundant Masses/scan |
|-------|-------------|------|------------|---------------------------|
| 1     | 1           | 0.31 | 9.15107 E6 | 442.00723                 |

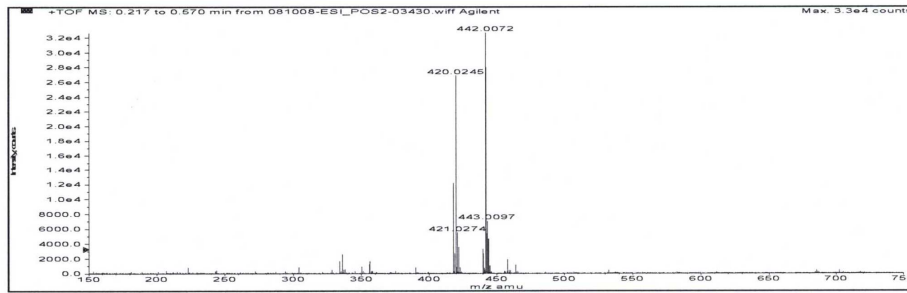

Peak# : 1 Experiment# : 1 Retention Time : 0.31 min

Sample Name: YG1-159-1 Sample Location: P1-C-06 Sample Id: YG1-159-1 Operator: EasyAccess  
 Data File Name: D:\PE Sciex Data\Projects\chemist10-08\Data\231008-ESI\_POS2-03571.wiff Acq Time: October 23 2008, 01:13:20 PM  
 Method: D:\TOF\_Data\damethods\EASY ACCESS2.ANM\efc.xml

One or more scans have failed IRM. Review the data file for details.

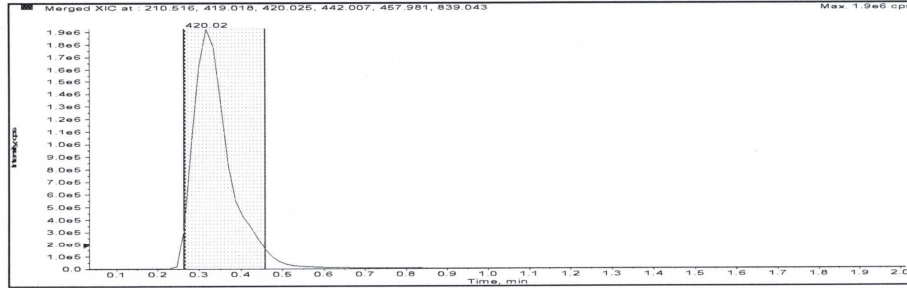

Merged XIC, Period# : 1 Experiment# : 1

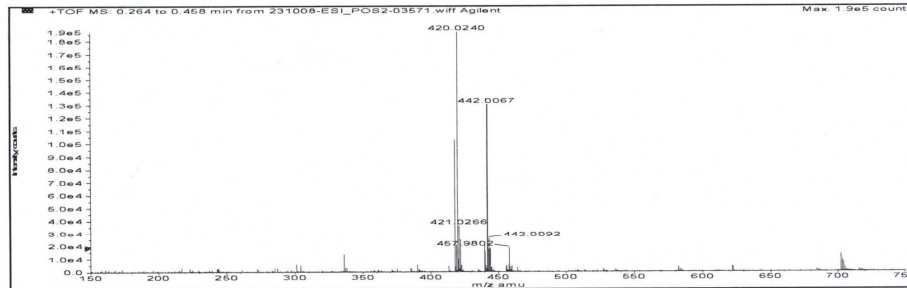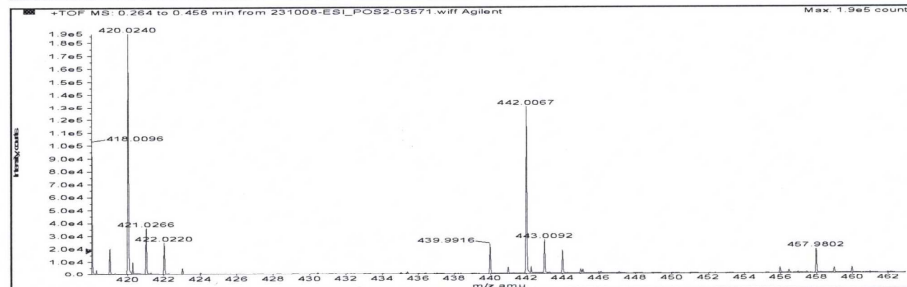

| Formula      | Compound name | Mass      | Peak RT (min) | Peak area  | Description |
|--------------|---------------|-----------|---------------|------------|-------------|
| C16H13N5O3S3 | --            | 419.01805 | 0.32          | 1.13325 E7 | --          |

| Species             | Abundance (counts) | Ion Mass  | Measured Mass | Error (mDa) | Error (ppm) | Ret. Time Error (min) |
|---------------------|--------------------|-----------|---------------|-------------|-------------|-----------------------|
| M+                  | 20825.27           | 419.01750 | 419.01239     | -5.11698    | -12.21      | --                    |
| [M+H] <sup>+</sup>  | 186981.04          | 420.02533 | 420.02397     | -1.35572    | -3.23       | --                    |
| [M+Na] <sup>+</sup> | 131203.64          | 442.00727 | 442.00667     | -0.60229    | -1.36       | --                    |
| [M+K] <sup>+</sup>  | 20152.54           | 457.98121 | 457.98015     | -1.05493    | -2.30       | --                    |

Thursday, October 23, 2008

13:15:32 PM



**Area % Report**

Data File: C:\EZChrom Elite\Enterprise\Projects\HTS Chemistry\Data\Yiyu\proteasome\YG1-159-1 CH3CN 40 H2O 60 TFA 0.1 1ml 40 min.met 8-20-2010 12-17-32 PM.dat  
 Method: C:\EZChrom Elite\Enterprise\Projects\HTS Chemistry\Method\Yiyu\analytical\CH3CN 40 H2O 60 TFA 0.1 1ml 40 min postrun.met  
 Acquired: 8/20/2010 12:19:49 PM  
 Printed: 11/2/2010 1:24:34 PM

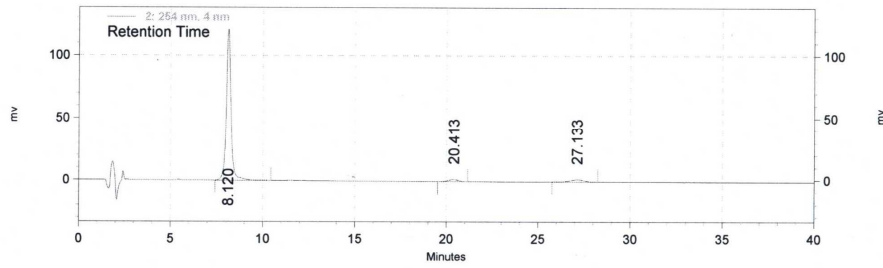

**2: 254 nm, 4 nm Results**

| Retention Time | Area           | Area %        |
|----------------|----------------|---------------|
| 8.120          | 2148498        | 93.14         |
| 20.413         | 62418          | 2.71          |
| 27.133         | 95754          | 4.15          |
| <b>Totals</b>  | <b>2306670</b> | <b>100.00</b> |

### 3. Compound 15c

#### <sup>1</sup>H NMR

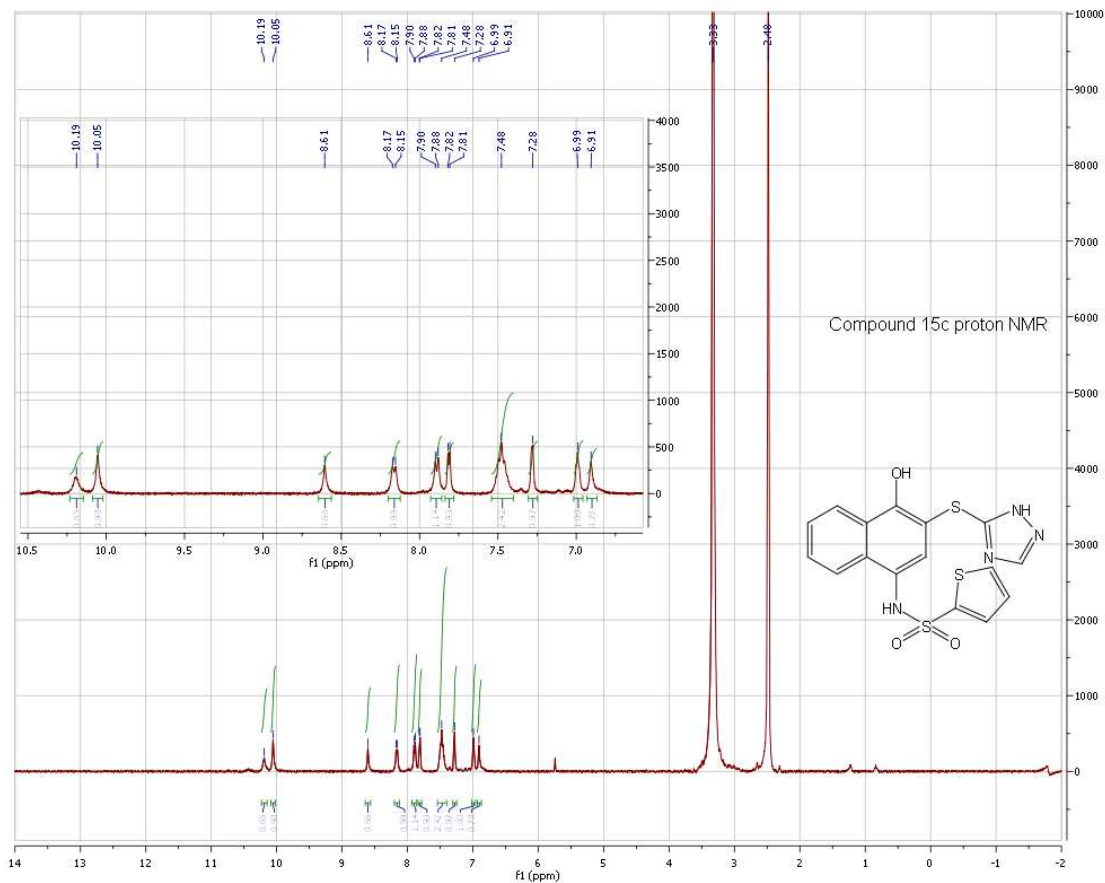

#### <sup>13</sup>C NMR

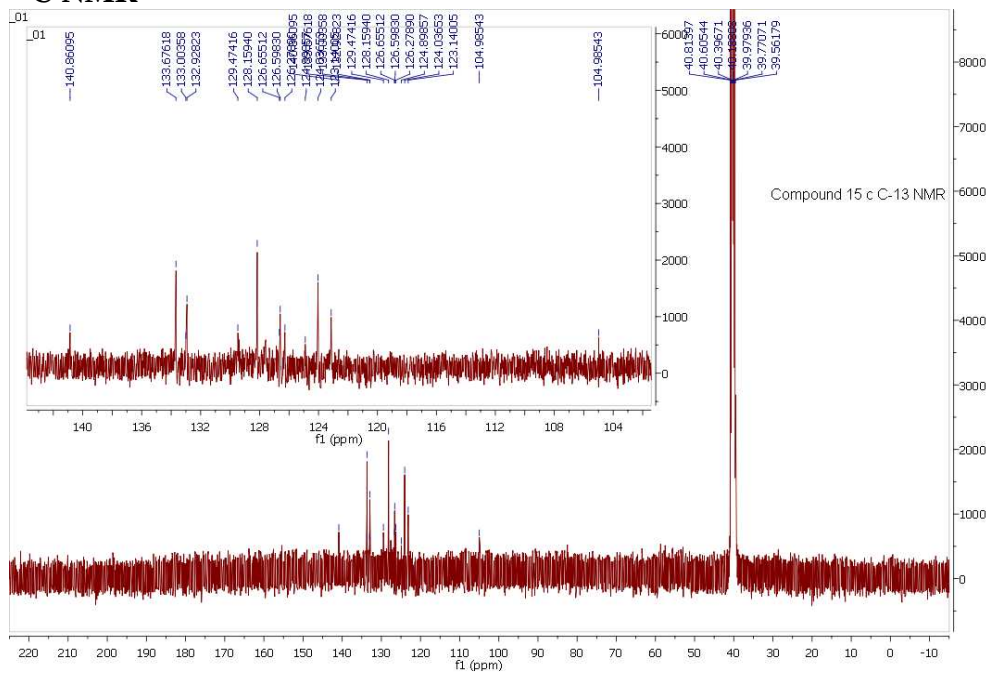

Sample#: YG1-159-2 Sample Location: P1-A-06 Sample Id: YG1-159-2 Operator: EasyAccess  
 Data File Name: D:\PE\_Sciex\_Data\Projects\chemist10-08\Data\221008-NEG100\_1000-03563.wiff Acq Time: October 22 2008, 05:11:12 PM  
 Method: D:\TOF\_Data\damethods\EASY ACCESS1.ANM\mass\_list.xml

One or more scans have failed IRM. Review the data file for details.

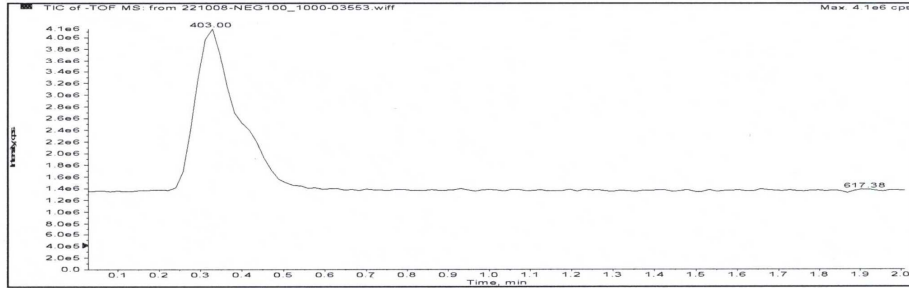

Period#: Average of all periods Experiment#: Average of all experiments

| Peak# | Experiment# | Time | Area       | Most Abundant Masses/scan |
|-------|-------------|------|------------|---------------------------|
| 1     | 1           | 0.33 | 2.01775 E7 | 402.99952                 |

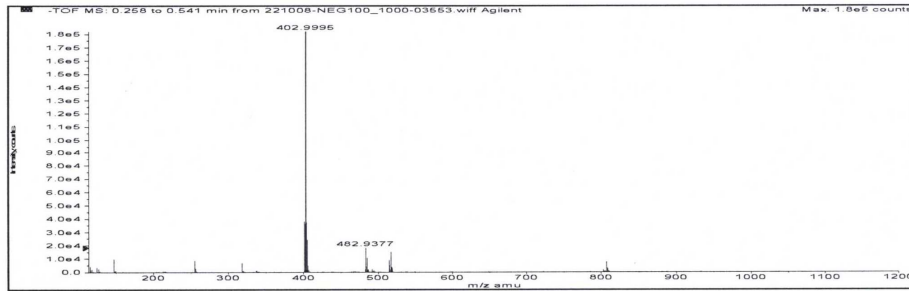

Peak#: 1 Experiment#: 1 Retention Time : 0.33 min

Sample Name: YG1-159-2 Sample Location: P1-C-01 Sample Id: YG1-159-2 Operator: EasyAccess  
 Data File Name: D:\PE Sciex\_Data\Projects\chemist\10-08\Data\231008-NEG100\_1000-03566.wiff Acq Time: October 23 2008, 12:50:10 PM  
 Method: D:\TOF\_Data\damethods\EASY\_ACCESS2.ANM\efc.xml

One or more scans have failed IRM. Review the data file for details.

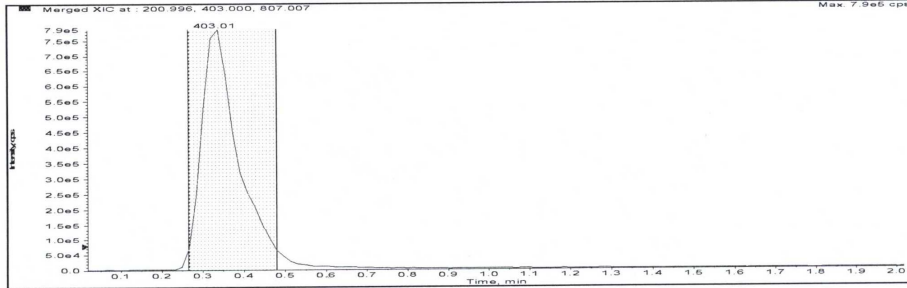

Merged XIC, Period# : 1 Experiment# : 1

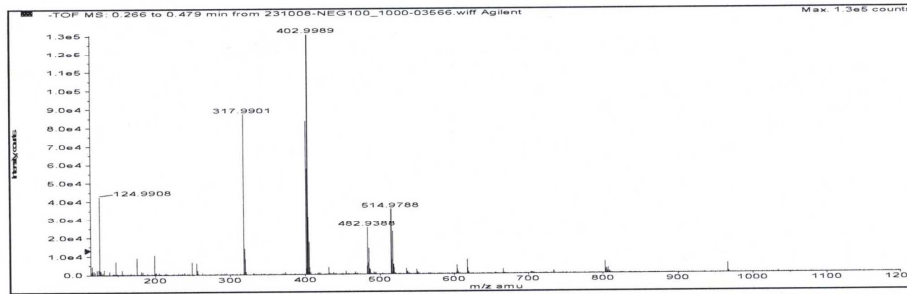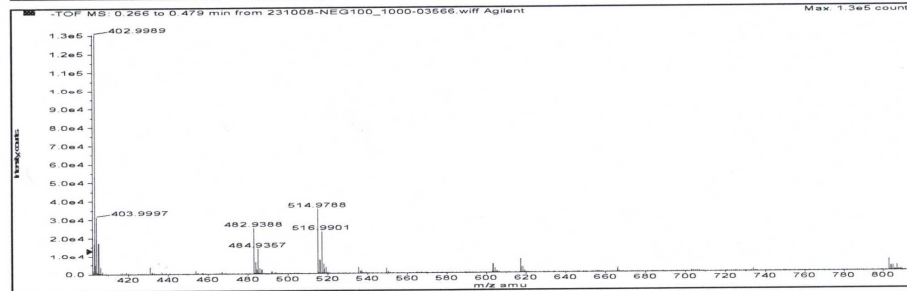

| Formula      | Compound name | Mass      | Peak RT (min) | Peak area  | Description |
|--------------|---------------|-----------|---------------|------------|-------------|
| C16H12N4O3S3 | --            | 404.00715 | 0.33          | 4.93637 E6 | --          |

| Species | Abundance (counts) | Ion Mass  | Measured Mass | Error (mDa) | Error (ppm) | Ret. Time Error (min) |
|---------|--------------------|-----------|---------------|-------------|-------------|-----------------------|
| [M-H]-  | 135976.83          | 402.99888 | 402.99892     | -0.95878    | -2.38       | --                    |
| [2M-H]- | 2926.85            | 807.00703 | 807.00339     | -3.63637    | -4.51       | --                    |

Thursday, October 23, 2008

12:52:22 PM

**Area % Report**

Data File: C:\EZChrom Elite\Enterprise\Projects\HTS Chemistry\Data\Yiyu\proteasome\YG1-159-2 CH3CN  
 40 H2O 60 TFA 0.1 1ml 40 min.met 8-16-2010 6-50-06 PM  
 Method: C:\EZChrom Elite\Enterprise\Projects\HTS Chemistry\Method\Yiyu\analytical\CH3CN 40 H2O  
 60 TFA 0.1 1ml 40 min postrun.met  
 Acquired: 8/16/2010 6:50:50 PM  
 Printed: 11/2/2010 1:23:20 PM

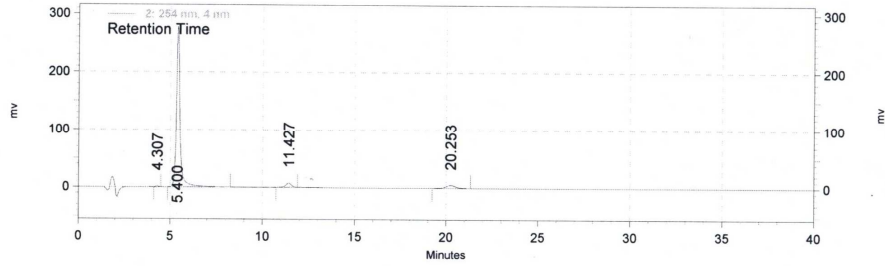

**2: 254 nm, 4 nm Results**

| Retention Time | Area           | Area %        |
|----------------|----------------|---------------|
| 4.307          | 15723          | 0.38          |
| 5.400          | 3817846        | 91.71         |
| 11.427         | 149246         | 3.59          |
| 20.253         | 180116         | 4.33          |
| <b>Totals</b>  | <b>4162931</b> | <b>100.00</b> |

## 4. Compound 15d

### <sup>1</sup>H NMR

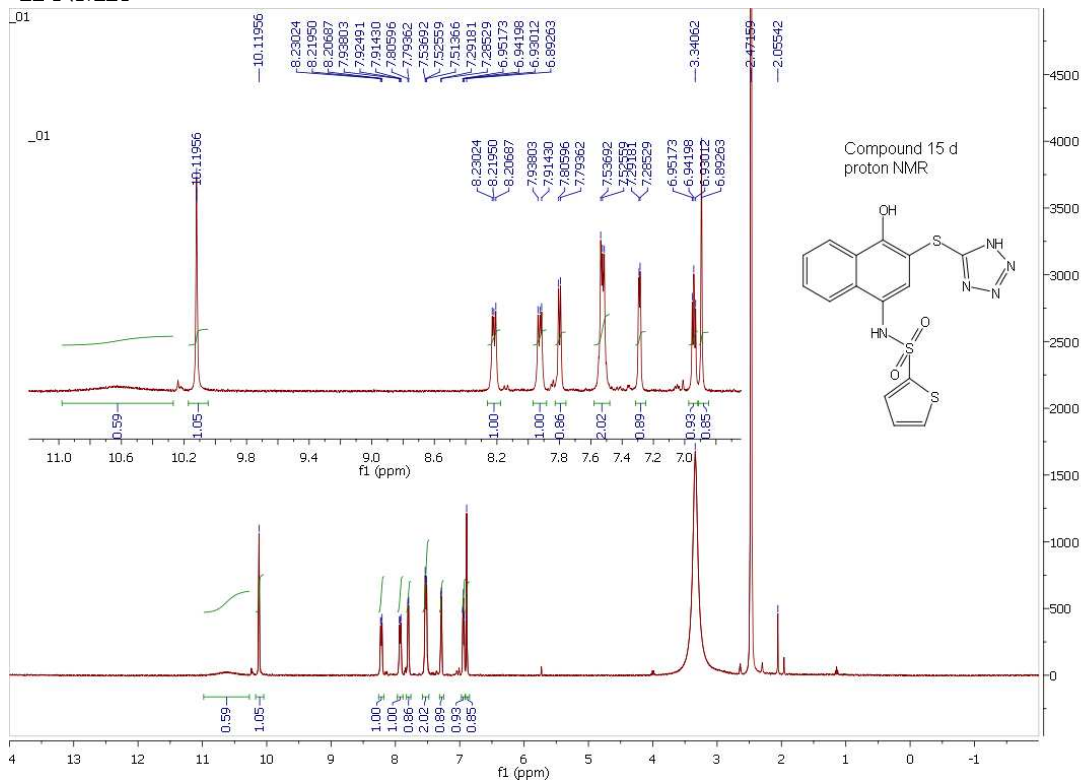

### <sup>13</sup>C NMR

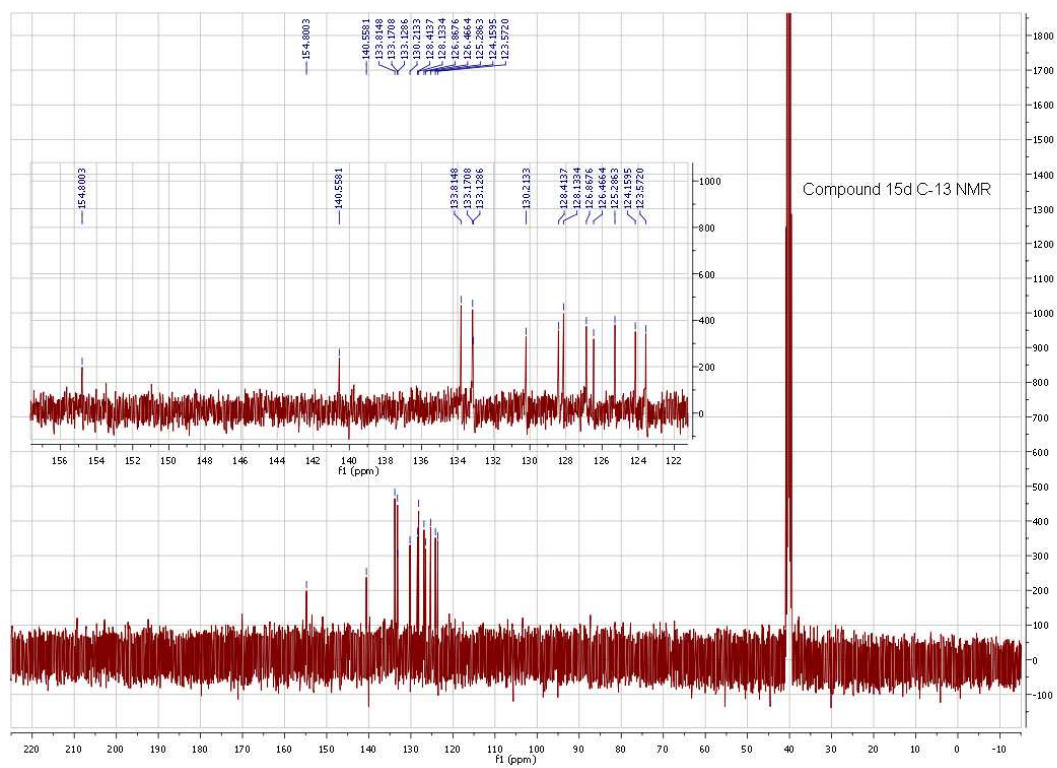

Sample#: YG4-040-2 Sample Location: P1-B-03 Sample Id: YG4-040-2 Operator: EasyAccess  
 Data File Name: D:\PE Sciex Data\Projects\chemist08-10\Data\060810-ESI\_POS2-15228.wiff Acq Time: August 06 2010, 04:42:36 PM  
 Method: D:\TOF\_Data\damethods\EASY ACCESS1.ANM\mass\_list.xml

One or more scans have failed IRM. Review the data file for details.

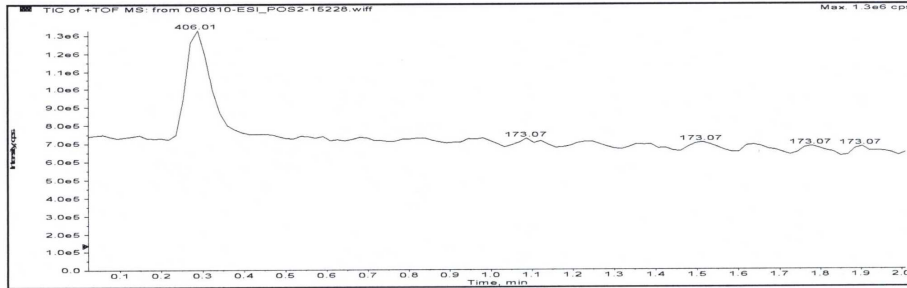

Period#: Average of all periods Experiment#: Average of all experiments

| Peak# | Experiment# | Time | Area       | Most Abundant Masses/scan |
|-------|-------------|------|------------|---------------------------|
| 1     | 1           | 0.29 | 2.71028 E6 | 406.00700                 |

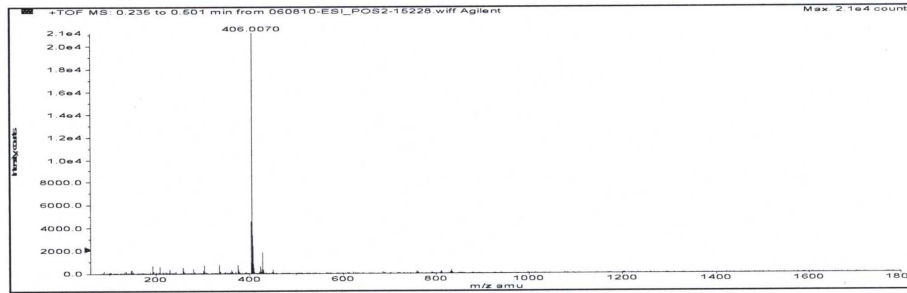

Peak#: 1 Experiment#: 1 Retention Time: 0.29 min

Sample Name: YG4-040-2 Sample Location: P1-C-01 Sample Id: YG4-040-2 Operator: EasyAccess  
 Data File Name: D:\PE\_Sciex\_Data\Projects\chemist08-10\Data\060810-ESI\_POS2-15235.wiff Acq Time: August 06 2010, 05:04:36 PM  
 Method: D:\TOF\_Data\damethods\EASY\_ACCESS2.ANM\efc.xml

One or more scans have failed IRM. Review the data file for details.

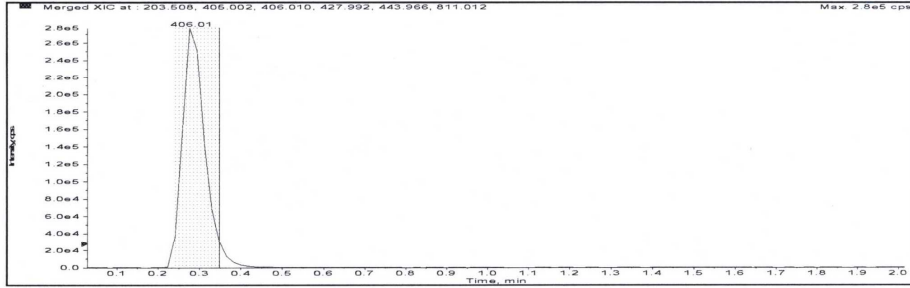

Merged XIC, Period#: 1 Experiment#: 1

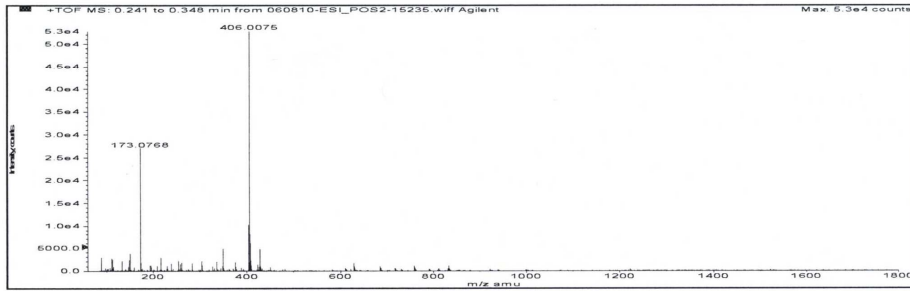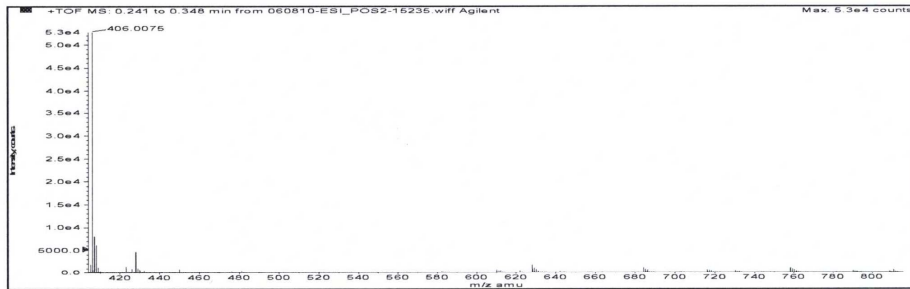

| Formula      | Compound name | Mass      | Peak RT (min) | Peak area  | Description |
|--------------|---------------|-----------|---------------|------------|-------------|
| C15H11N5O3S3 | --            | 405.00240 | 0.28          | 1.05080 E6 | --          |

| Species             | Abundance (counts) | Ion Mass  | Measured Mass | Error (mDa) | Error (ppm) | Ret. Time Error (min) |
|---------------------|--------------------|-----------|---------------|-------------|-------------|-----------------------|
| M+                  | 1919.27            | 405.00185 | 404.99629     | -5.55965    | -13.73      | --                    |
| [M+H] <sup>+</sup>  | 52837.78           | 406.00968 | 406.00754     | -2.14179    | -5.28       | --                    |
| [M+Na] <sup>+</sup> | 4772.00            | 427.99162 | 427.98902     | -2.60337    | -6.08       | --                    |

Friday, August 06, 2010

17:06:50 PM



**Area % Report**

Data File: C:\EZChrom Elite\Enterprise\Projects\HTS Chemistry\Data\Yiyu\proteasome\YG4-040-2 CH3CN  
 35 H2O 65 TFA 0.1 1ml 30 min.met 8-9-2010 3-16-19 PM  
 Method: C:\EZChrom Elite\Enterprise\Projects\HTS Chemistry\Method\untitled.met  
 Acquired: 8/9/2010 3:17:03 PM  
 Printed: 10/29/2010 4:48:12 PM

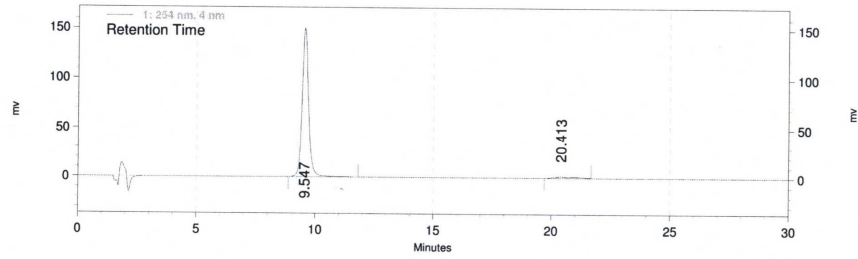

**1: 254 nm, 4 nm**

**Results**

| Retention Time | Area           | Area %        | Height        | Height %      |
|----------------|----------------|---------------|---------------|---------------|
| 9.547          | 2841826        | 96.42         | 150553        | 98.90         |
| 20.413         | 105595         | 3.58          | 1678          | 1.10          |
| <b>Totals</b>  | <b>2947421</b> | <b>100.00</b> | <b>152231</b> | <b>100.00</b> |

## 5. Compound 15h

### <sup>1</sup>H NMR

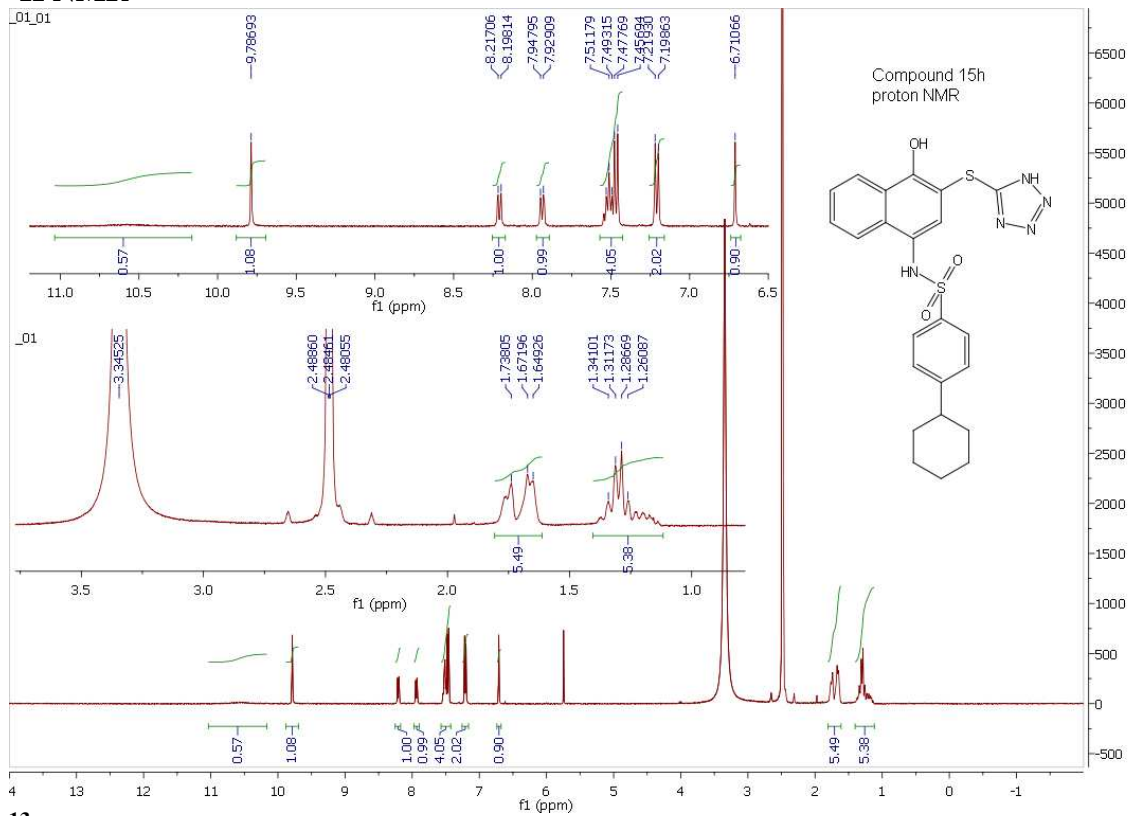

### <sup>13</sup>C NMR

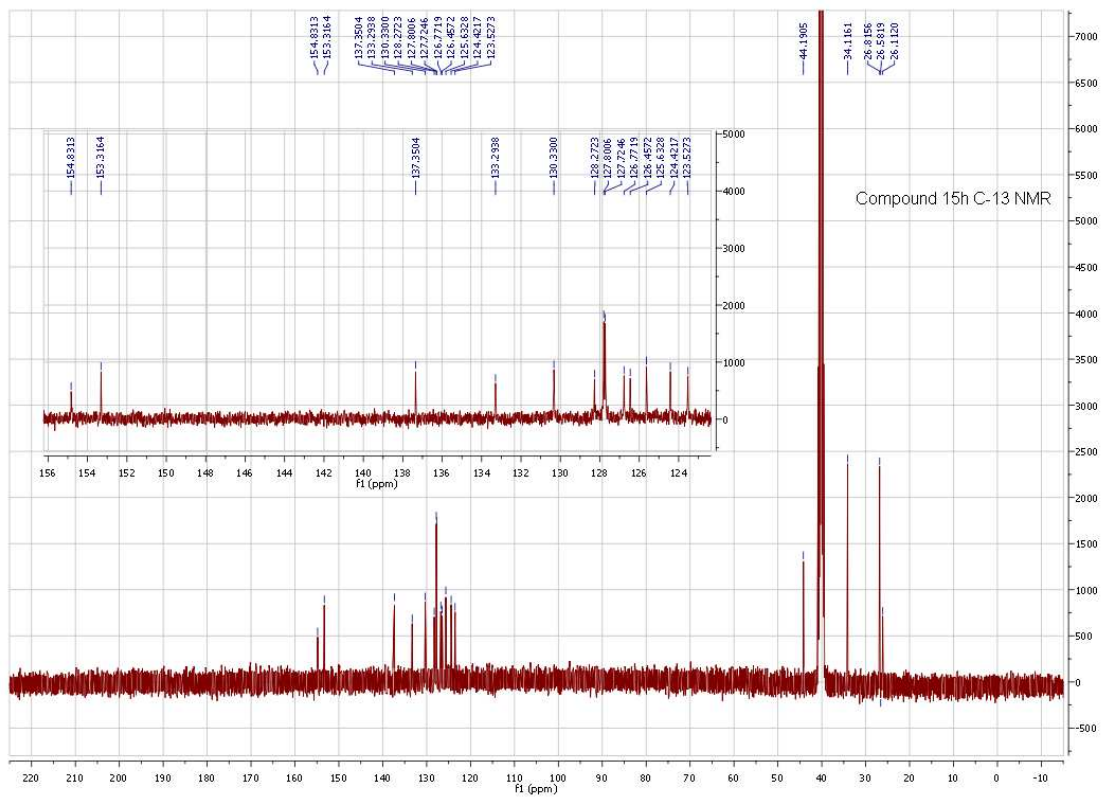

Sample#: YG4-112-1 Sample Location: P1-C-06 Sample Id: YG4-112-1 Operator: EasyAccess  
 Data File Name: D:\PE\_Sciex\_Data\Projects\Yiyu Ge\05-11\Data\YG4-112-11-240511-ESI\_POS2.wiff Acq Time: May 24 2011, 01:45:35 PM  
 Method: D:\TOF\_Data\damethods\EASY\_ACESS1.ANM\mass\_list.xml

One or more scans have failed IRM. Review the data file for details.

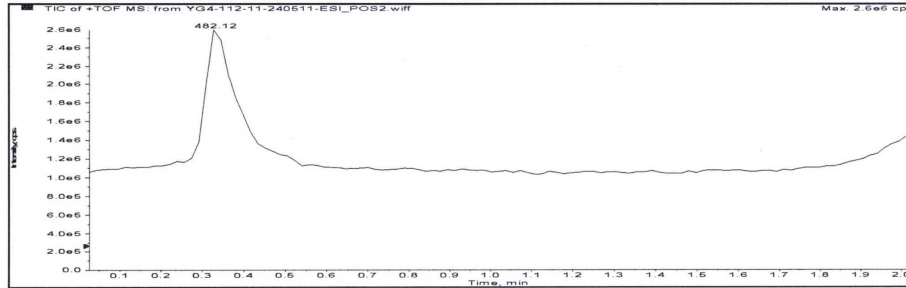

Period#: Average of all periods Experiment#: Average of all experiments

| Peak# | Experiment# | Time | Area       | Most Abundant Masses/scan |
|-------|-------------|------|------------|---------------------------|
| 1     | 1           | 0.33 | 8.58794 E6 | 482.13168                 |

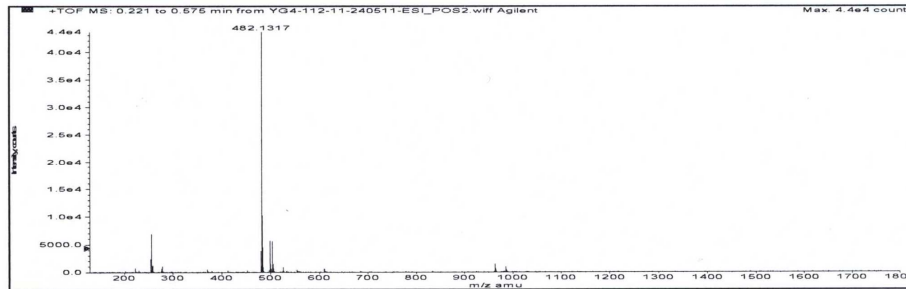

Peak#: 1 Experiment#: 1 Retention Time: 0.33 min

Sample Name: YG4-112-1 Sample Location: P1-D-01 Sample Id: YG4-112-1 Operator: EasyAccess  
 Data File Name: D:\PE\_Sciex\_Data\Projects\Yiyu Ge\10-10\Data\YG4-112-11-221010-ESI\_POS2.wiff Acq Time: October 22 2010, 01:53:10 PM  
 Method: D:\TOF\_Data\damethods\EASY ACCESS2.ANM\efc.xml

One or more scans have failed IRM. Review the data file for details.

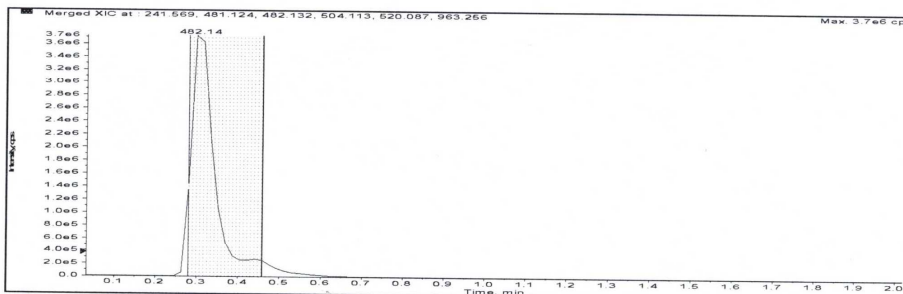

Merged XIC, Period# : 1 Experiment# : 1

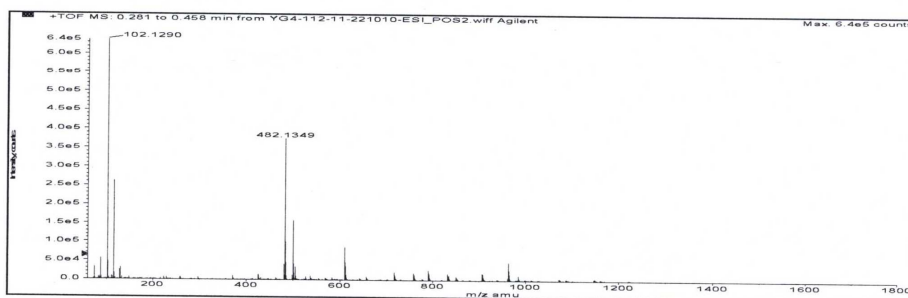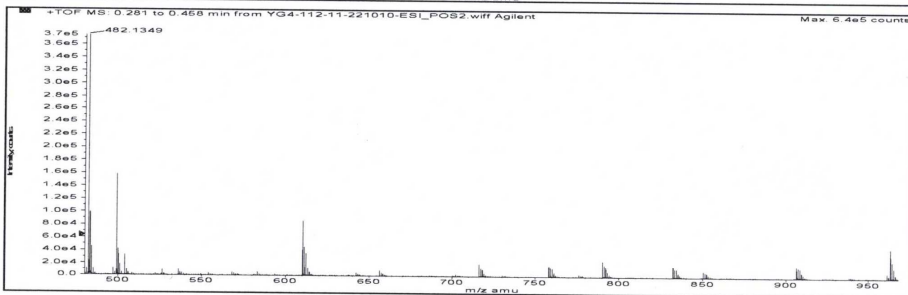

| Formula      | Compound name | Mass      | Peak RT (min) | Peak area  | Description |
|--------------|---------------|-----------|---------------|------------|-------------|
| C23H23N5O3S2 | --            | 481.12423 | 0.31          | 1.50053 E7 | --          |

| Species             | Abundance (counts) | Ion Mass  | Measured Mass | Error (mDa) | Error (ppm) | Ret. Time Error (min) |
|---------------------|--------------------|-----------|---------------|-------------|-------------|-----------------------|
| M+                  | 11209.37           | 481.12368 | 481.12463     | 0.94722     | 1.97        | --                    |
| [M+H] <sup>+</sup>  | 390907.19          | 482.13151 | 482.13487     | 3.36201     | 6.97        | --                    |
| [M+Na] <sup>+</sup> | 33888.36           | 504.11345 | 504.11685     | 3.40078     | 6.75        | --                    |
| [2M+H] <sup>+</sup> | 48438.21           | 963.25574 | 963.26119     | 5.44751     | 5.66        | --                    |

Friday, October 22, 2010

13:55:23 PM

**Area % Report**

Data File: C:\EZChrom Elite\Enterprise\Projects\HTS Chemistry\Data\Yiyu\proteasome\YG4-112-1 CH3CN  
 50 H2O 50 TFA 0.1 lml 40 min.met 11-1-2010 9:39:31 PM  
 Method: C:\EZChrom Elite\Enterprise\Projects\HTS Chemistry\Method\untitled.met  
 Acquired: 11/1/2010 9:40:17 PM  
 Printed: 11/2/2010 8:59:34 AM

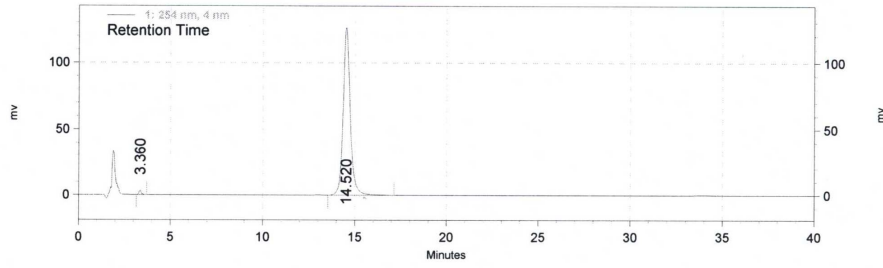

**1: 254 nm, 4 nm  
 Results**

| Retention Time | Area           | Area %        | Height        | Height %      |
|----------------|----------------|---------------|---------------|---------------|
| 3.360          | 29592          | 0.86          | 3388          | 2.61          |
| 14.520         | 3429846        | 99.14         | 126423        | 97.39         |
| <b>Totals</b>  | <b>3459438</b> | <b>100.00</b> | <b>129811</b> | <b>100.00</b> |

## 6. Compound 15j

### <sup>1</sup>H NMR

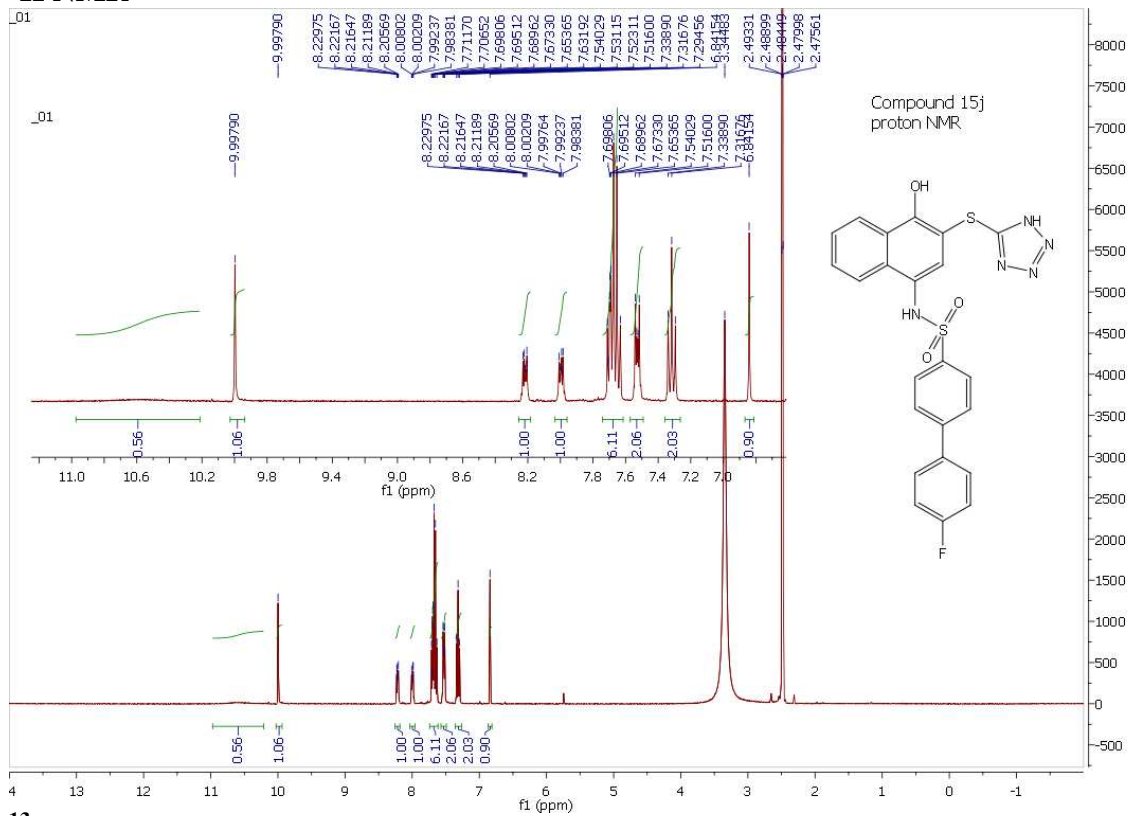

### <sup>13</sup>C NMR

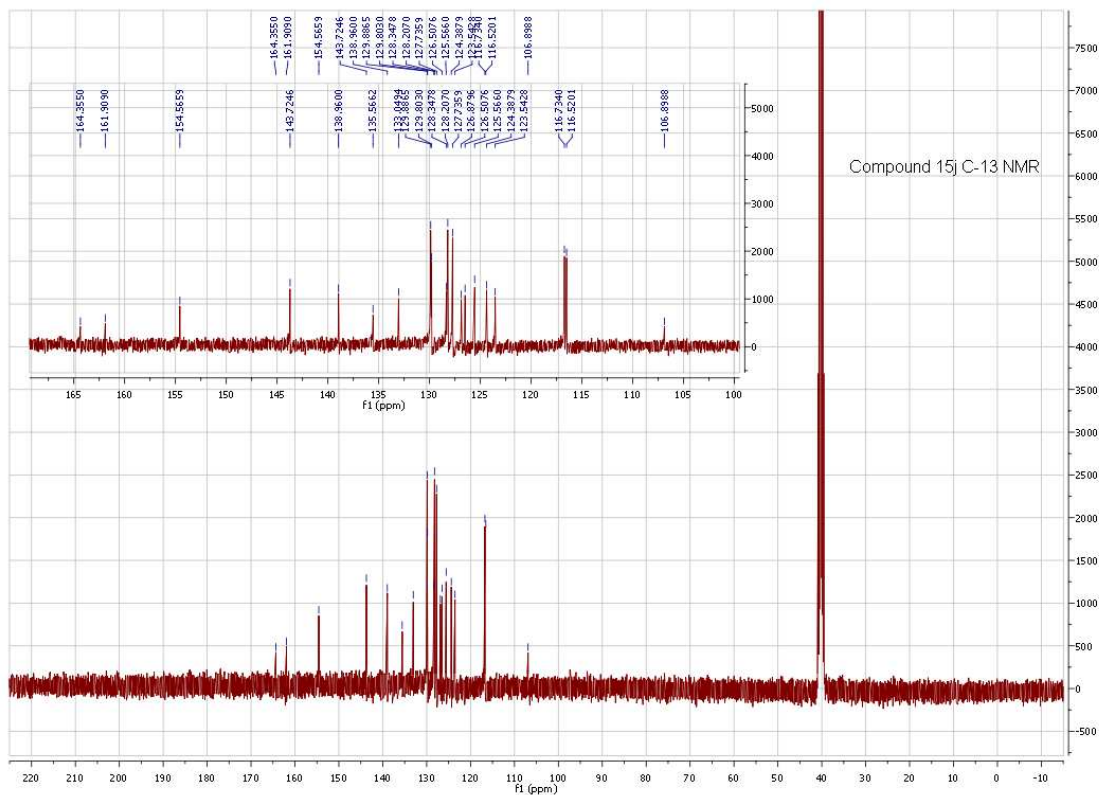

Sample#: YG4-112-2 Sample Location: P1-B-01 Sample Id: YG4-112-2 Operator: EasyAccess  
 Data File Name: D:\PE\_Sciex\_Data\Projects\Yiyu Ge\10-10\Data\YG4-112-21-221010-ESI\_POS2.wiff Acq Time: October 22 2010, 12:33:18 PM  
 Method: D:\TOF\_Data\damethods\EASY\_ACESS1.ANM\mass\_list.xml

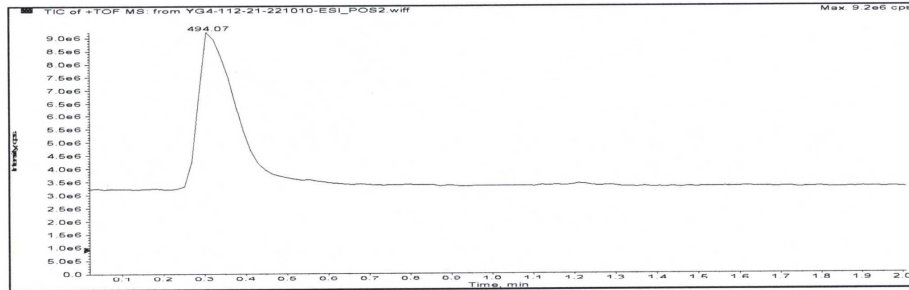

Period#: Average of all periods Experiment#: Average of all experiments

| Peak# | Experiment# | Time | Area       | Most Abundant Masses/scan |
|-------|-------------|------|------------|---------------------------|
| 1     | 1           | 0.31 | 3.84290 E7 | 102.12778                 |

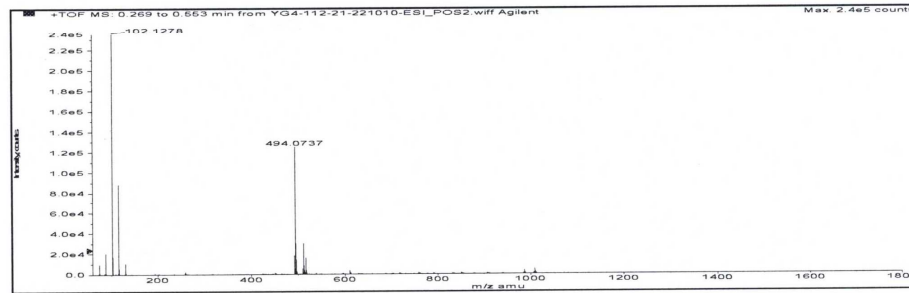

Peak#: 1 Experiment#: 1 Retention Time: 0.31 min

Sample Name: YG4-112-2 Sample Location: P1-D-02 Sample Id: YG4-112-2 Operator: EasyAccess  
 Data File Name: D:\PE Sciex Data\Projects\Yiyu Ge\10-10\Data\YG4-112-21-221010-ESI\_POS2.wiff Acq Time: October 22 2010, 01:58:27 PM  
 Method: D:\TOF\_Data\damethods\EASY\_ACESS2.ANM\efc.xml

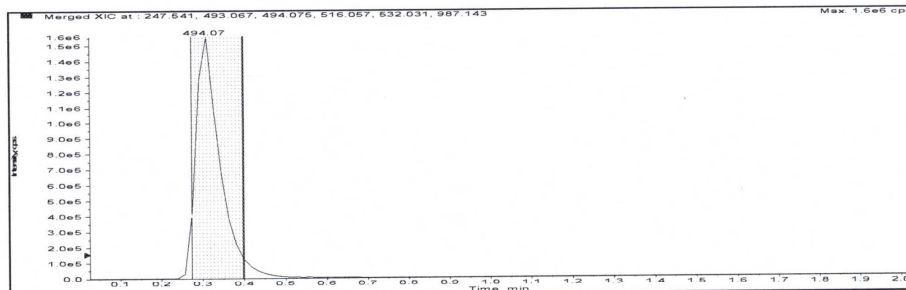

Merged XIC, Period# : 1 Experiment# : 1

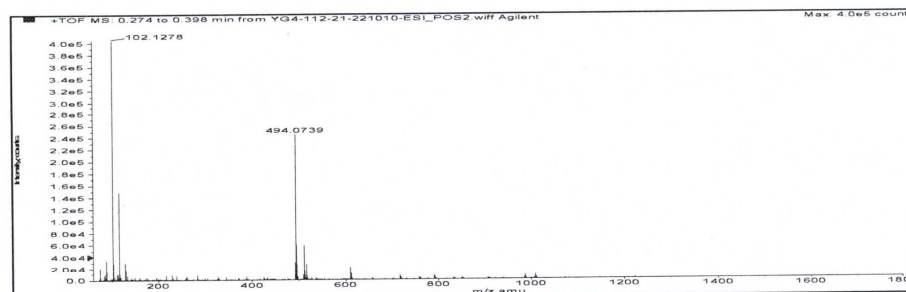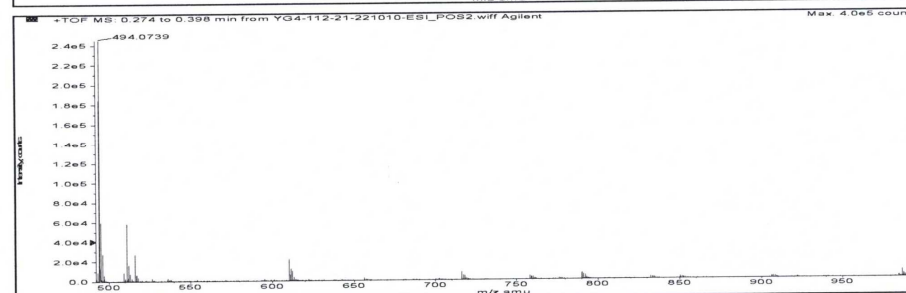

| Formula       | Compound name | Mass      | Peak RT (min) | Peak area  | Description |
|---------------|---------------|-----------|---------------|------------|-------------|
| C23H16FN5O3S2 | --            | 493.06786 | 0.31          | 6.26626 E6 | --          |

| Species             | Abundance (counts) | Ion Mass  | Measured Mass | Error (mDa) | Error (ppm) | Ret. Time Error (min) |
|---------------------|--------------------|-----------|---------------|-------------|-------------|-----------------------|
| M+                  | 9307.48            | 493.06731 | 493.06116     | -6.14645    | -12.47      | --                    |
| [M+H] <sup>+</sup>  | 246536.55          | 494.07514 | 494.07394     | -1.19645    | -2.42       | --                    |
| [M+Na] <sup>+</sup> | 26985.03           | 516.05708 | 516.05637     | -0.71237    | -1.38       | --                    |
| [2M+H] <sup>+</sup> | 7303.21            | 987.14299 | 987.13984     | -3.15505    | -3.20       | --                    |

Friday, October 22, 2010

13:58:41 PM



# HPLC

## Area % Report

Page 1 of 1

Data File: C:\EZChrom Elite\Enterprise\Projects\HTS Chemistry\Data\Yiyu\proteasome\YG4-112-2 CH3CN  
45 H2O 55 TFA 0.1 1ml 40 min.met 10-27-2010 2-55-33 AM  
Method: C:\EZChrom Elite\Enterprise\Projects\HTS Chemistry\Method\untitled.met  
Acquired: 10/27/2010 2:56:14 AM  
Printed: 10/29/2010 4:36:47 PM

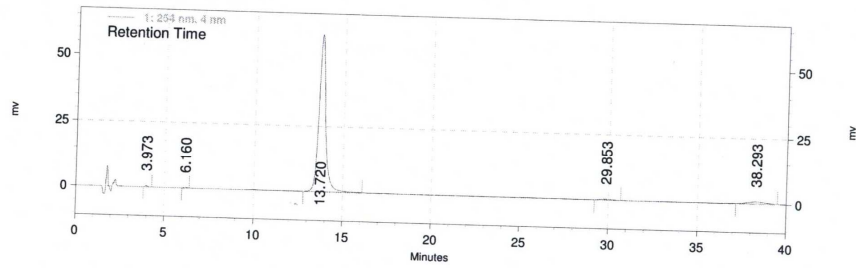

### 1: 254 nm, 4 nm

#### Results

| Retention Time | Area    | Area % | Height | Height % |
|----------------|---------|--------|--------|----------|
| 3.973          | 5146    | 0.31   | 567    | 0.92     |
| 6.160          | 3531    | 0.21   | 317    | 0.52     |
| 13.720         | 1585545 | 95.36  | 59413  | 96.66    |
| 29.853         | 15522   | 0.93   | 366    | 0.60     |
| 38.293         | 52990   | 3.19   | 802    | 1.30     |
| Totals         | 1662734 | 100.00 | 61465  | 100.00   |

## 7. Compound 15k

### <sup>1</sup>H NMR

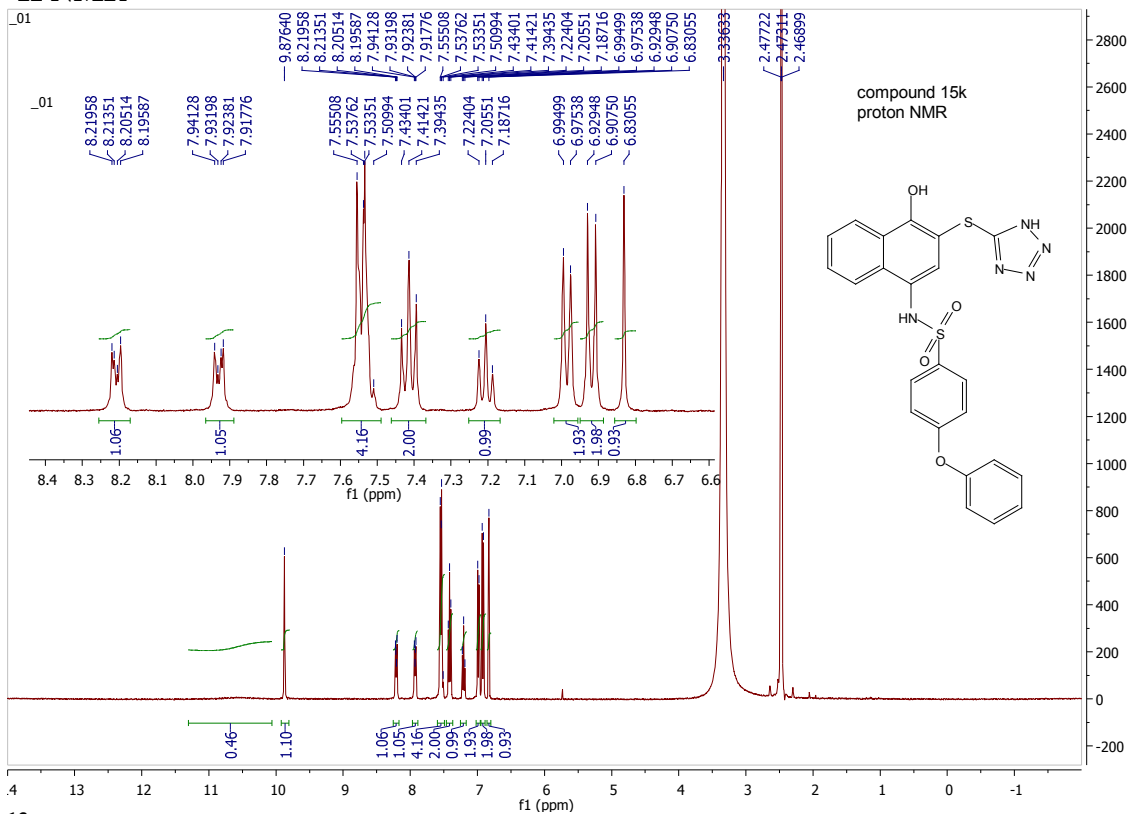

### <sup>13</sup>C NMR

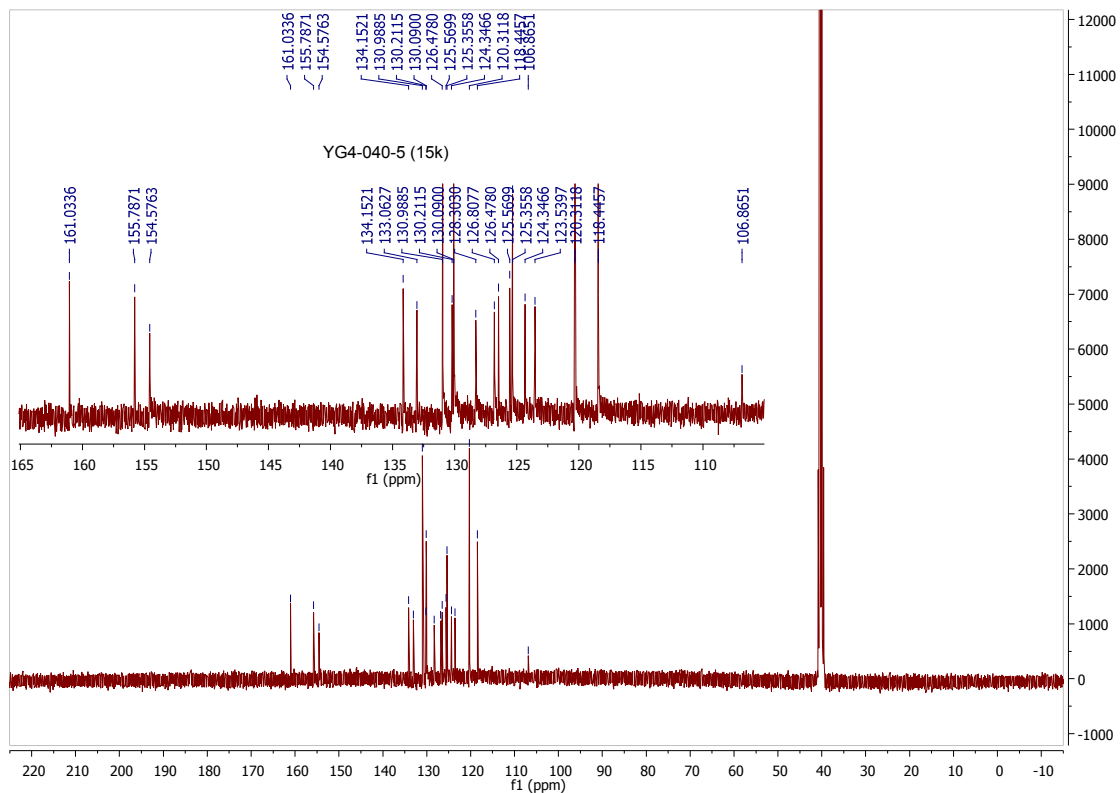

# LC-MS

Sample#: YG4-040-5 Sample Location: P1-B-07 Sample id: YG4-040-5 Operator: EasyAccess  
 Data File Name: D:\PE\_Sciex\_Data\Projects\chemist08-10\Data\060810-ESI\_POS2-15232.wiff Acq Time: August 06 2010, 04:55:10 PM  
 Method: D:\TOF\_Data\amethods\EASY ACCESS1.ANM\mass\_list.xml

One or more scans have failed IRM. Review the data file for details.

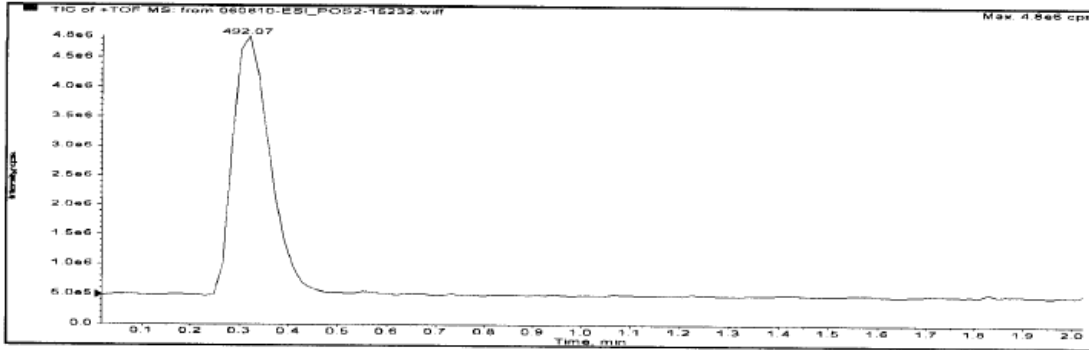

Period#: Average of all periods Experiment#: Average of all experiments

| Peak# | Experiment# | Time | Area       | Most Abundant Masses/scan |
|-------|-------------|------|------------|---------------------------|
| 1     | 1           | 0.31 | 2.29417 E7 | 492.07558                 |

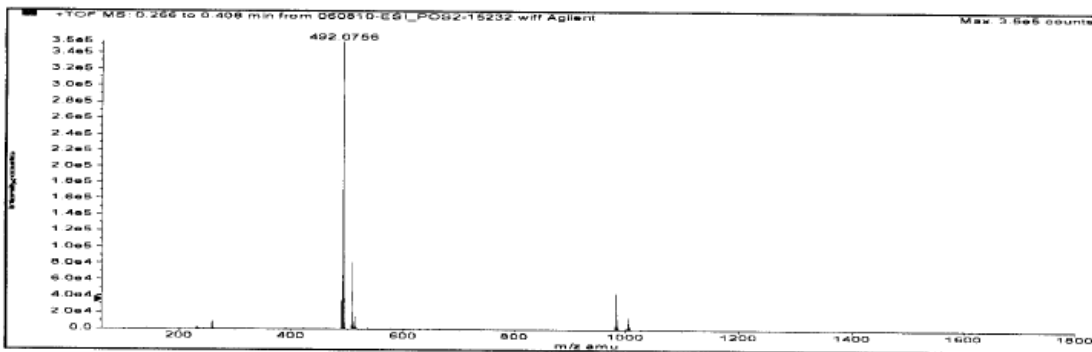

Peak#: 1 Experiment#: 1 Retention Time: 0.31 min

Friday, August 06, 2010

16:57:18 PM

# HRMS

Sample Name: YG4-040-5 Sample Location: P1-C-05 Sample Id: YG4-040-5 Operator: EasyAccess  
 Data File Name: D:\PE\_Scienc\_Data\Projects\chemist08-10\Data\060810-ESI\_POS2-15239.wiff Acq Time: August 06 2010, 05:17:39 PM  
 Method: D:\TOF\_Data\damethods\EASY\_ACCESS2.ANM\efc.xml

One or more scans have failed IRM. Review the data file for details.

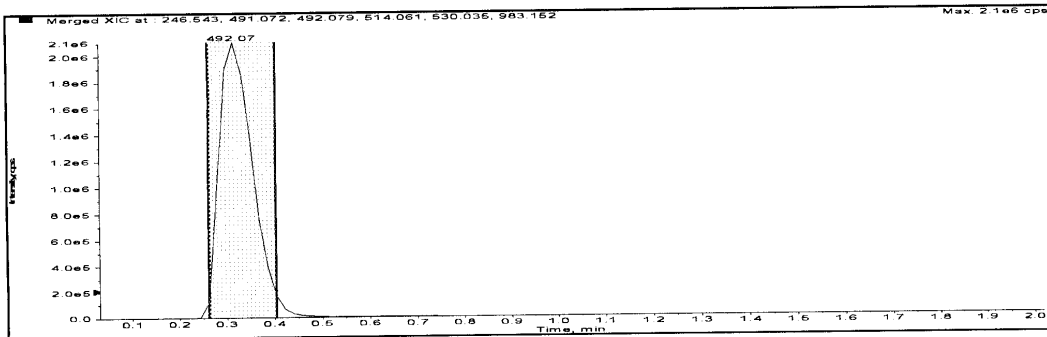

Merged XIC, Period#: 1 Experiment#: 1

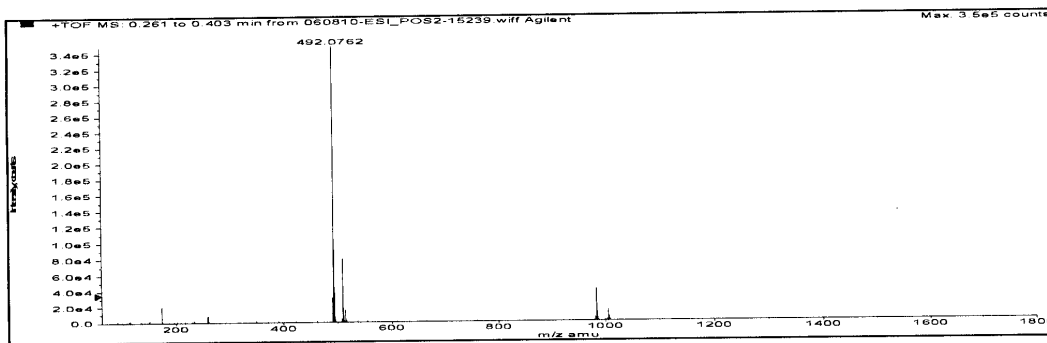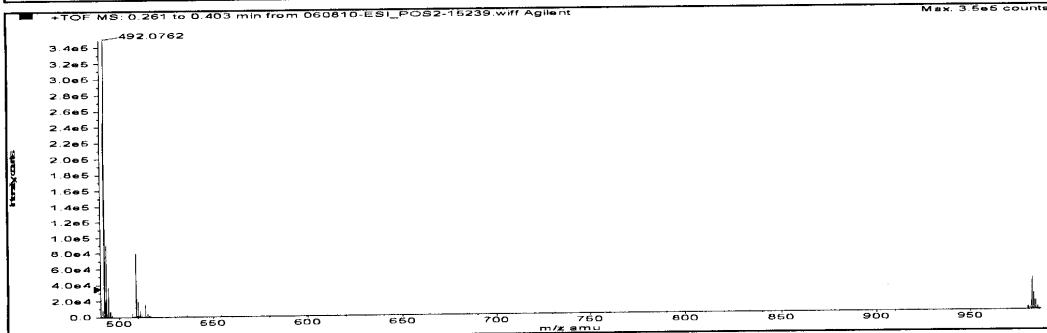

| Formula      | Compound name | Mass      | Peak RT (min) | Peak area  | Description |
|--------------|---------------|-----------|---------------|------------|-------------|
| C23H17N5O4S2 | --            | 491.07220 | 0.31          | 1.03613 E7 | --          |

| Species             | Abundance (counts) | Ion Mass  | Measured Mass | Error (mDa) | Error (ppm) | Ret. Time Error (min) |
|---------------------|--------------------|-----------|---------------|-------------|-------------|-----------------------|
| M+                  | 8287.65            | 491.07165 | 491.06368     | -7.96960    | -16.23      | --                    |
| [M+H] <sup>+</sup>  | 359946.57          | 492.07947 | 492.07620     | -3.27546    | -6.66       | --                    |
| [M+Na] <sup>+</sup> | 15508.62           | 514.06142 | 514.05876     | -2.66056    | -5.18       | --                    |
| [2M+H] <sup>+</sup> | 41565.94           | 983.15167 | 983.14487     | -6.79518    | -6.91       | --                    |

Friday, August 06, 2010

17:19:52 PM

# HPLC

## Area % Report

Data File: C:\EZChrom Elite\Enterprise\Projects\HTS Chemistry\Data\Yiyu\proteasome\YG4-040-5 CH3CN  
50 H2O 50 TFA 0.1 1ml 30 min.met 8-9-2010 11-00-23 PM  
Method: C:\EZChrom Elite\Enterprise\Projects\HTS Chemistry\Method\untitled.met  
Acquired: 8/9/2010 11:01:10 PM  
Printed: 10/29/2010 4:44:04 PM

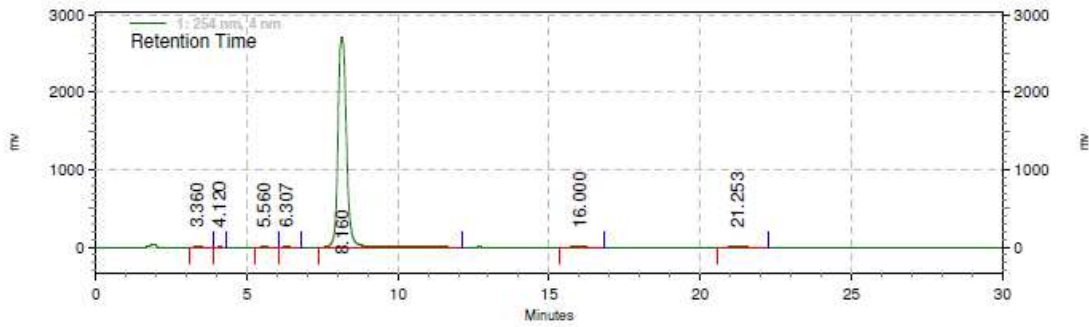

### 1: 254 nm, 4 nm

#### Results

| Retention Time | Area     | Area % | Height  | Height % |
|----------------|----------|--------|---------|----------|
| 3.360          | 56218    | 0.11   | 5992    | 0.22     |
| 4.120          | 10924    | 0.02   | 1198    | 0.04     |
| 5.560          | 29549    | 0.06   | 2021    | 0.07     |
| 6.307          | 25592    | 0.05   | 2008    | 0.07     |
| 8.160          | 52618247 | 99.50  | 2700174 | 99.43    |
| 16.000         | 75004    | 0.14   | 2599    | 0.10     |
| 21.253         | 67909    | 0.13   | 1757    | 0.06     |
| Totals         | 52883443 | 100.00 | 2715749 | 100.00   |

## 8. Compound 29

### <sup>1</sup>H NMR

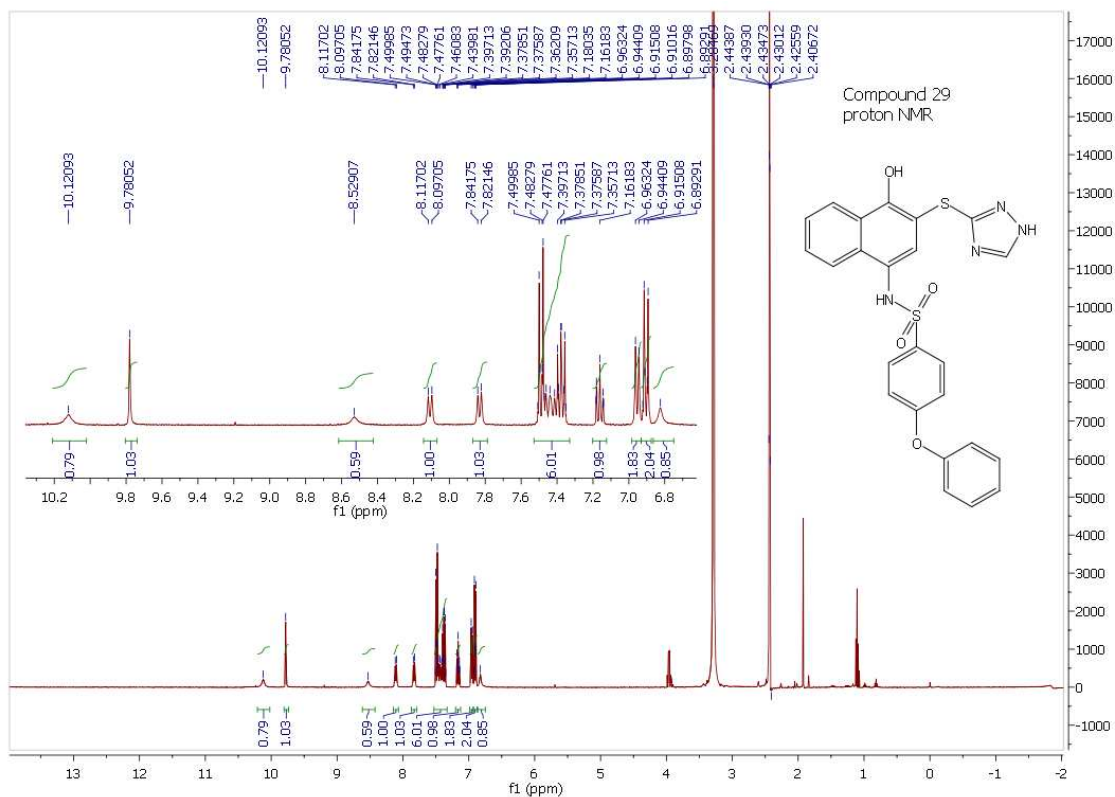

### <sup>13</sup>C NMR

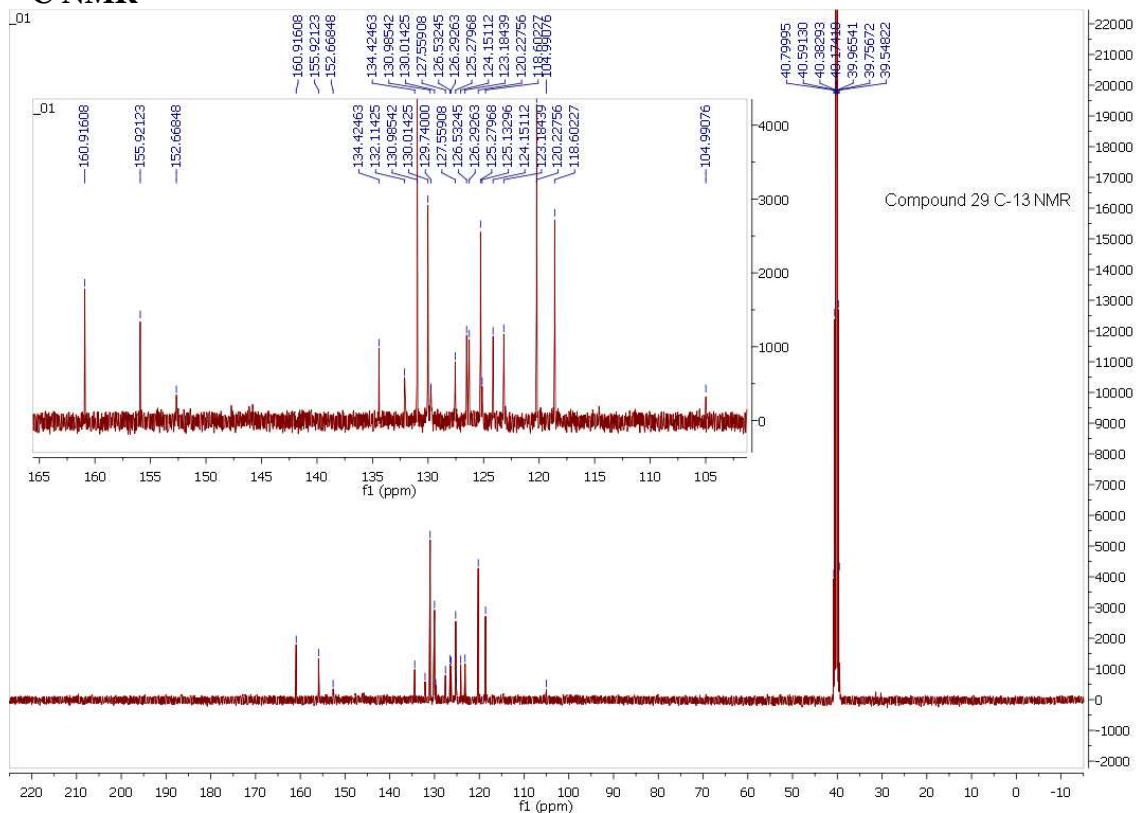

Sample#: YG4-019-1 Sample Location: P1-E-03 Sample Id: YG4-019-2 Operator: EasyAccess  
 Data File Name: D:\PE\_Sciex\_Data\Projects\chemist07-10\Data\160710-ESI\_POS2-14197.wiff Acq Time: July 16 2010, 04:38:27 PM  
 Method: D:\TOF\_Data\damethods\EASY\_ACCESS1.ANM\mass\_list.xml

One or more scans have failed IRM. Review the data file for details.

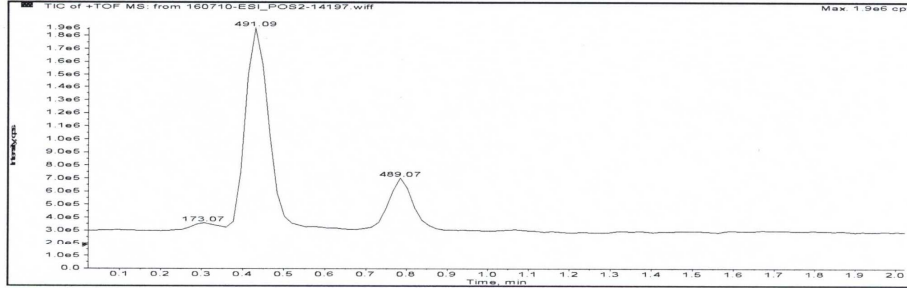

Period#: Average of all periods Experiment#: Average of all experiments

| Peak# | Experiment# | Time | Area       | Most Abundant Masses/scan |
|-------|-------------|------|------------|---------------------------|
| 1     | 1           | 0.43 | 6.31694 E6 | 491.08617                 |

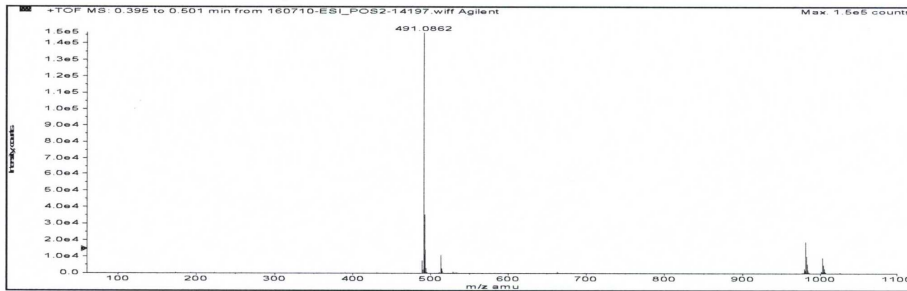

Peak#: 1 Experiment#: 1 Retention Time : 0.43 min

Sample Name: YG4-019-1 Sample Location: P1-A-09 Sample Id: YG4-019-1 Operator: EasyAccess  
 Data File Name: D:\PE Sciex\_Data\Projects\chemist\07-10\Data\160710-ESI\_POS2-14211.wiff Acq Time: July 16 2010, 05:44:33 PM  
 Method: D:\TOF\_Data\damethods\EASY\_ACCESS2.ANMeIc.xml

One or more scans have failed IRM. Review the data file for details.

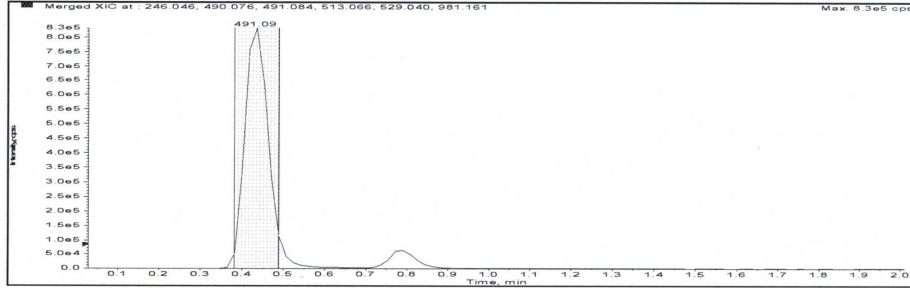

Merged XIC, Period# : 1 Experiment# : 1

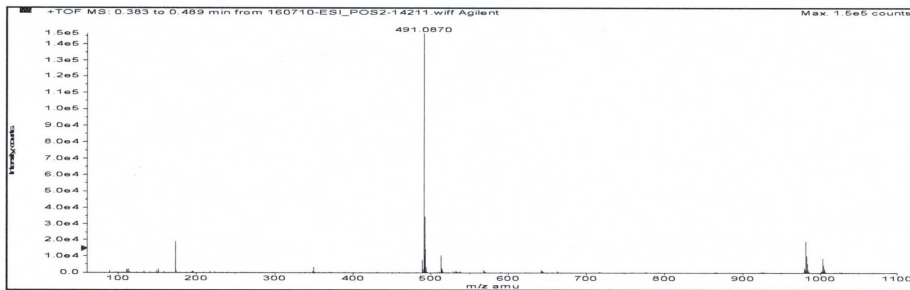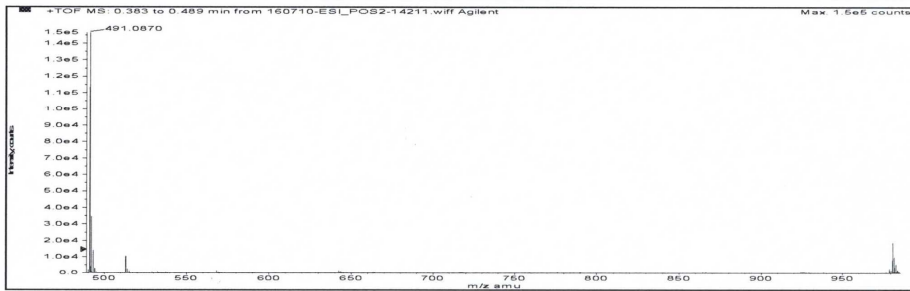

| Formula      | Compound name | Mass      | Peak RT (min) | Peak area  | Description |
|--------------|---------------|-----------|---------------|------------|-------------|
| C24H18N4O4S2 | --            | 490.07695 | 0.43          | 3.28869 E6 | --          |

| Species | Abundance (counts) | Ion Mass  | Measured Mass | Error (mDa) | Error (ppm) | Ret. Time Error (min) |
|---------|--------------------|-----------|---------------|-------------|-------------|-----------------------|
| M+      | 2189.12            | 490.07640 | 490.07464     | -1.76096    | -3.59       | --                    |
| [M+H]+  | 148950.13          | 491.08422 | 491.08697     | 2.74642     | 5.59        | --                    |
| [M+Na]+ | 10451.45           | 513.06617 | 513.06970     | 3.52869     | 6.88        | --                    |
| [2M+H]+ | 18871.08           | 981.16117 | 981.16489     | 3.72259     | 3.79        | --                    |

Friday, July 16, 2010

17:46:45 PM



**Area % Report**

Data File: C:\EZChrom Elite\Enterprise\Projects\HTS Chemistry\Data\Yiyu\proteasome\YG4-019-1 CH3CN  
 40 H2O 60 TFA 0.1 1ml 40 min.met 8-18-2010 2-47-17 AM  
 Method: C:\EZChrom Elite\Enterprise\Projects\HTS Chemistry\Method\untitled.met  
 Acquired: 8/18/2010 2:47:59 AM  
 Printed: 10/29/2010 5:02:13 PM

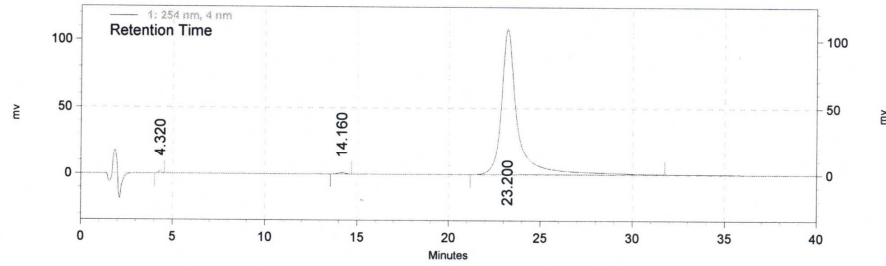

**1: 254 nm, 4 nm**

**Results**

| Retention Time | Area           | Area %        | Height        | Height %      |
|----------------|----------------|---------------|---------------|---------------|
| 4.320          | 15514          | 0.23          | 1684          | 1.51          |
| 14.160         | 27804          | 0.41          | 1060          | 0.95          |
| 23.200         | 6692262        | 99.36         | 108660        | 97.54         |
| <b>Totals</b>  | <b>6735580</b> | <b>100.00</b> | <b>111404</b> | <b>100.00</b> |

## 9. Compound 39

### <sup>1</sup>H NMR

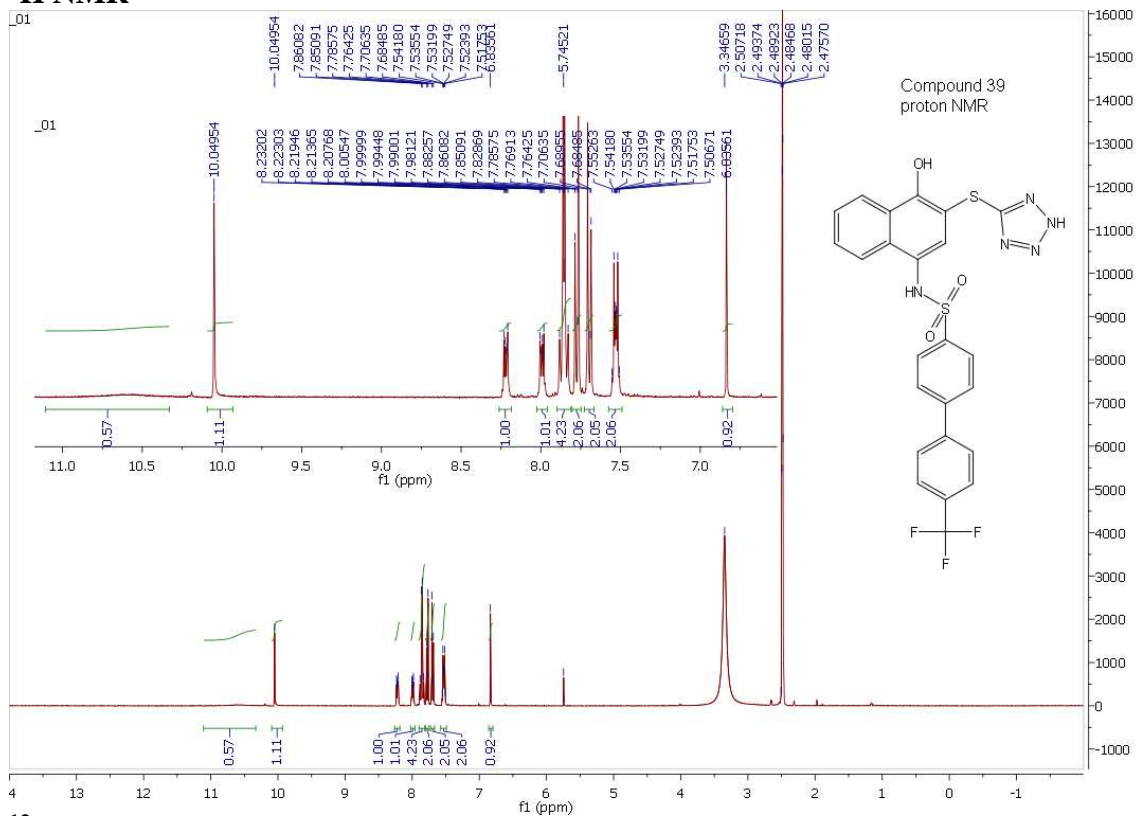

### <sup>13</sup>C NMR

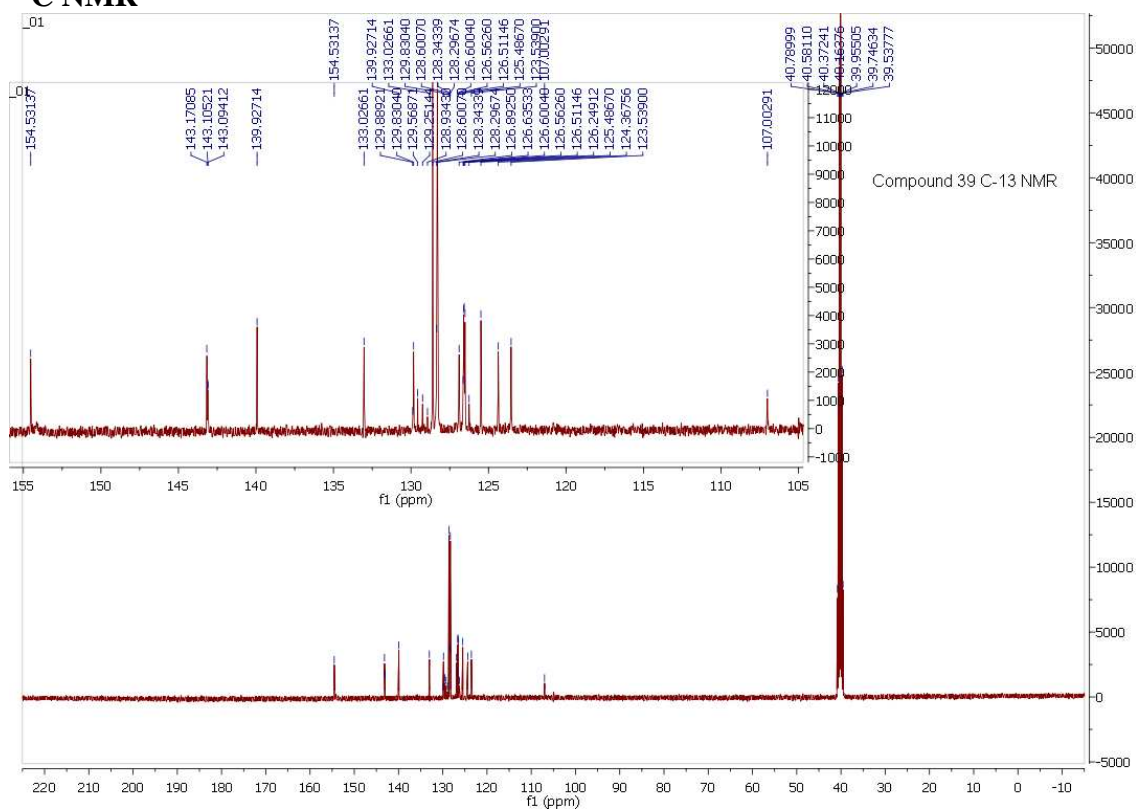

Sample#: YG4-112-3 Sample Location: P1-B-02 Sample Id: YG4-112-3 Operator: EasyAccess  
 Data File Name: D:\PE\_Sciex\_Data\Projects\Yiyu Ge\10-10\Data\YG4-112-31-221010-ESI\_POS2.wiff Acq Time: October 22 2010, 12:36:27 PM  
 Method: D:\TOF\_Data\damethods\EASY ACCESS1.ANM\mass\_list.xml

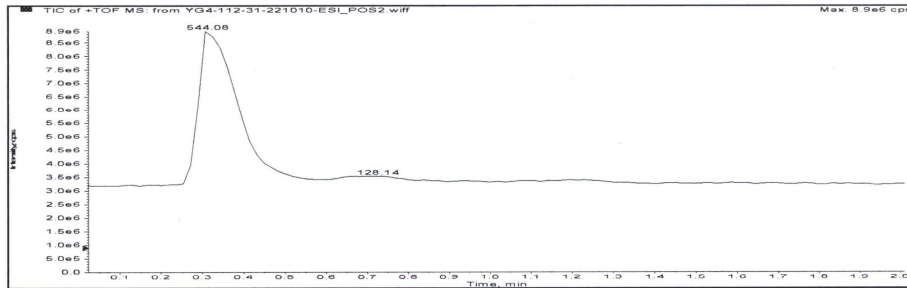

Period#: Average of all periods Experiment#: Average of all experiments

| Peak# | Experiment# | Time | Area       | Most Abundant Masses/scan |
|-------|-------------|------|------------|---------------------------|
| 1     | 1           | 0.31 | 3.87168 E7 | 102.12791                 |

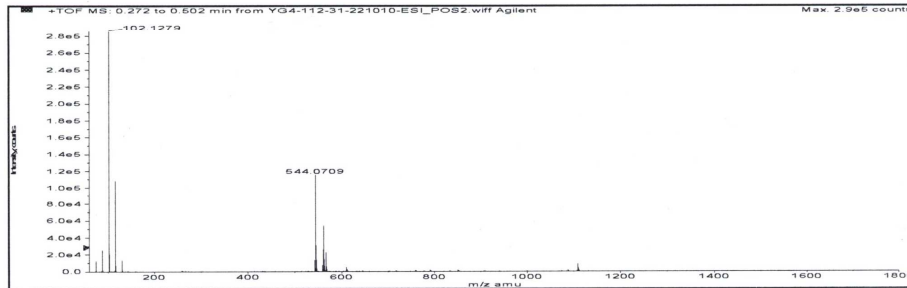

Peak#: 1 Experiment#: 1 Retention Time: 0.31 min

Sample Name: YG4-112-3 Sample Location: P1-D-03 Sample Id: YG4-112-3 Operator: EasyAccess  
 Data File Name: D:\PE Sciex Data\Projects\Yiyu Ge\10-10\Data\YG4-112-31-221010-ESI\_POS2.wiff Acq Time: October 22 2010, 01:59:43 PM  
 Method: D:\TOF\_Data\damethods\EASY\_ACESS2.ANM\efc.xml

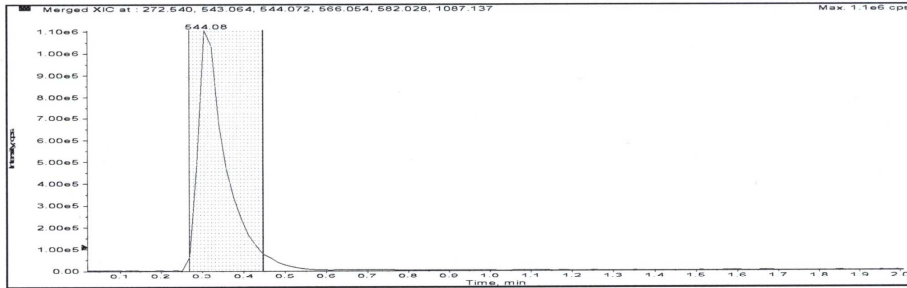

Merged XIC, Period# : 1 Experiment# : 1

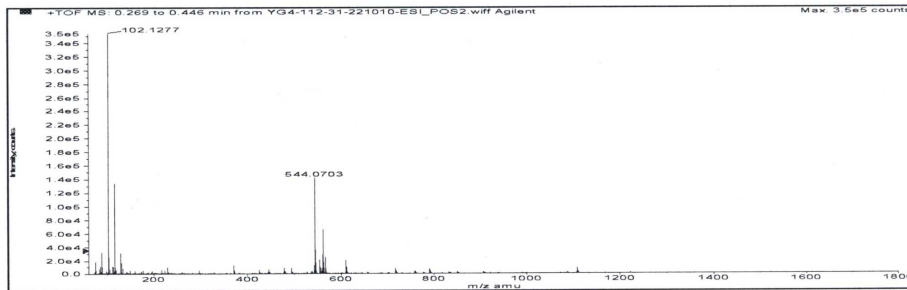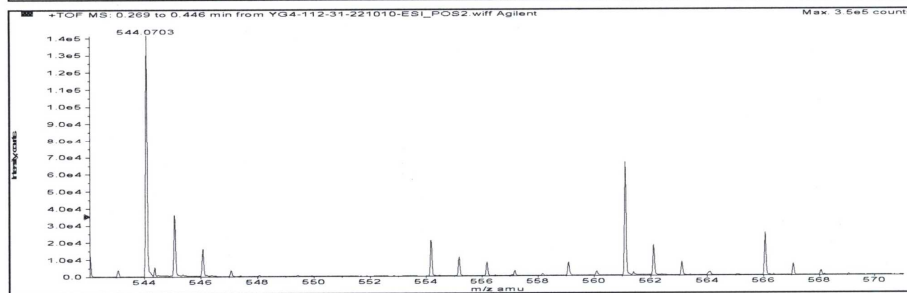

| Formula        | Compound name | Mass      | Peak RT (min) | Peak area  | Description |
|----------------|---------------|-----------|---------------|------------|-------------|
| C24H16F3N5O3S2 | --            | 543.06467 | 0.31          | 5.20252 E6 | --          |

| Species             | Abundance (counts) | Ion Mass  | Measured Mass | Error (mDa) | Error (ppm) | Ret. Time Error (min) |
|---------------------|--------------------|-----------|---------------|-------------|-------------|-----------------------|
| M+                  | 3959.35            | 543.06412 | 543.05716     | -6.95692    | -12.81      | --                    |
| [M+H] <sup>+</sup>  | 143213.52          | 544.07194 | 544.07035     | -1.59507    | -2.93       | --                    |
| [M+Na] <sup>+</sup> | 25292.71           | 566.05389 | 566.05250     | -1.38360    | -2.44       | --                    |

Friday, October 22, 2010

14:01:57 PM

**Area % Report**

Data File: C:\EZChrom Elite\Enterprise\Projects\HTS Chemistry\Data\Yiyu\proteasome\YG4-112-3 CH3CN  
 50 H2O 50 TFA 0.1 1ml 30 min.met 10-27-2010 10-35-25 AM  
 Method: C:\EZChrom Elite\Enterprise\Projects\HTS Chemistry\Method\untitled.met  
 Acquired: 10/27/2010 10:36:07 AM  
 Printed: 10/29/2010 4:35:07 PM

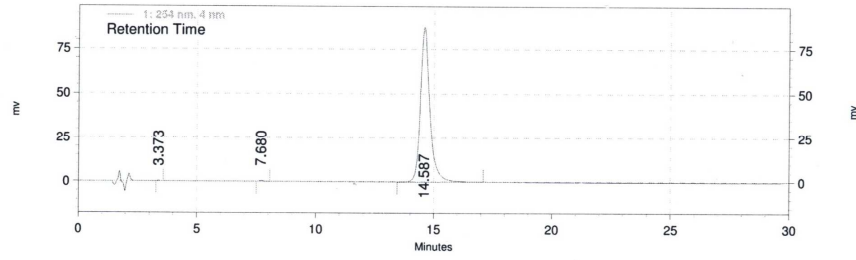

**1: 254 nm, 4 nm**

**Results**

| Retention Time | Area    | Area % | Height | Height % |
|----------------|---------|--------|--------|----------|
| 3.373          | 2888    | 0.12   | 392    | 0.44     |
| 7.680          | 7260    | 0.29   | 524    | 0.59     |
| 14.587         | 2464588 | 99.59  | 87415  | 98.96    |

| Totals | Area    | Area % | Height | Height % |
|--------|---------|--------|--------|----------|
|        | 2474736 | 100.00 | 88331  | 100.00   |

10.  $^1\text{H}$  NMR analysis of intermediates **8a**, **9a**, **12** and **13a** to show the regioselectivity of coupling described in Scheme 2.

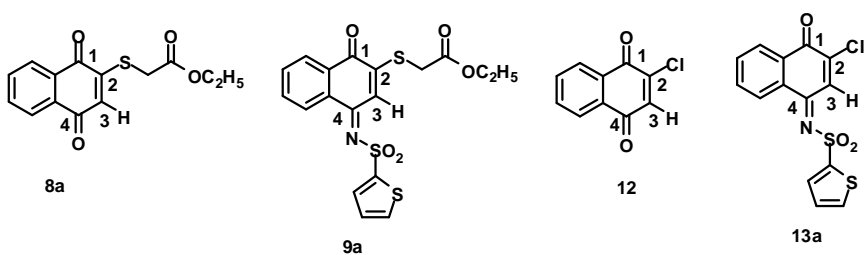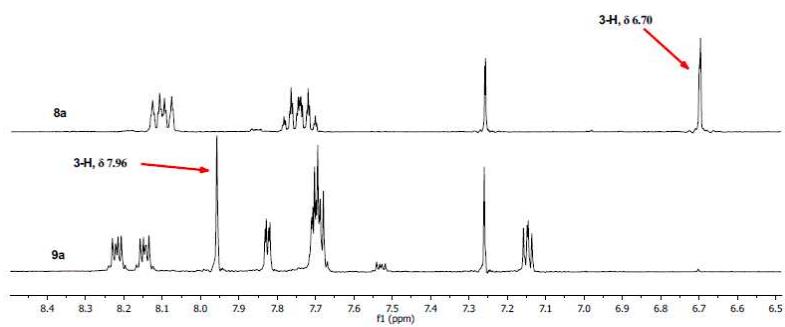

**A**

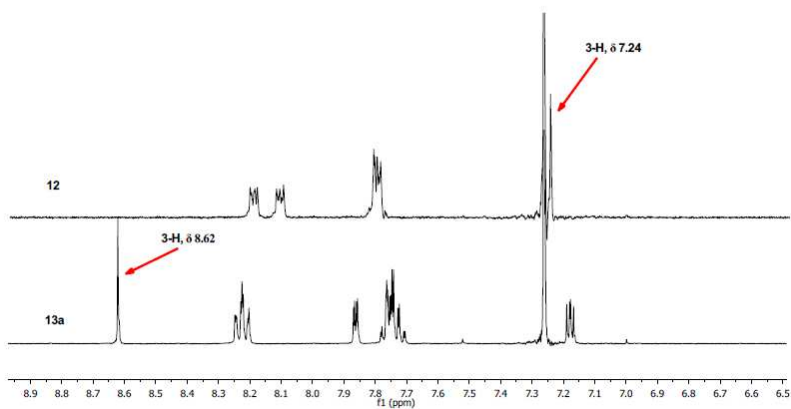

**B**

**Figure 1:** **A**, chemical shift (in  $\text{CDCl}_3$ , 400 MHz) of 3-H in compound **8a** (upper) and **9a** (lower); **B**, chemical shift (in  $\text{CDCl}_3$ , 400 MHz) of 3-H in compound **12** (upper) and **13a** (lower). These  $^1\text{H}$  NMRs indicate coupling intermediate **8a** and **12** with thiophenesulfonamide proceeded regioselectively at the 4-carbonyl of the naphthoquinone ring.
